# Supplementary material for: An assessment of the attitudes, knowledge, and education regarding the health care needs of LGBTQ patients with cancer: results of an ESMO/SIOPE global survey
Source: PubMed Central journal article supplement — ESMO Open. 2024 Jun 30;9(8):103618. doi: 10.1016/j.esmoop.2024.103618 (PMC11410726; doi:10.1016/j.esmoop.2024.103618), 2024-06-30

# Supplementary Figure 1. Survey demographics

## S1A - Gender identity according to sexual orientation of respondents

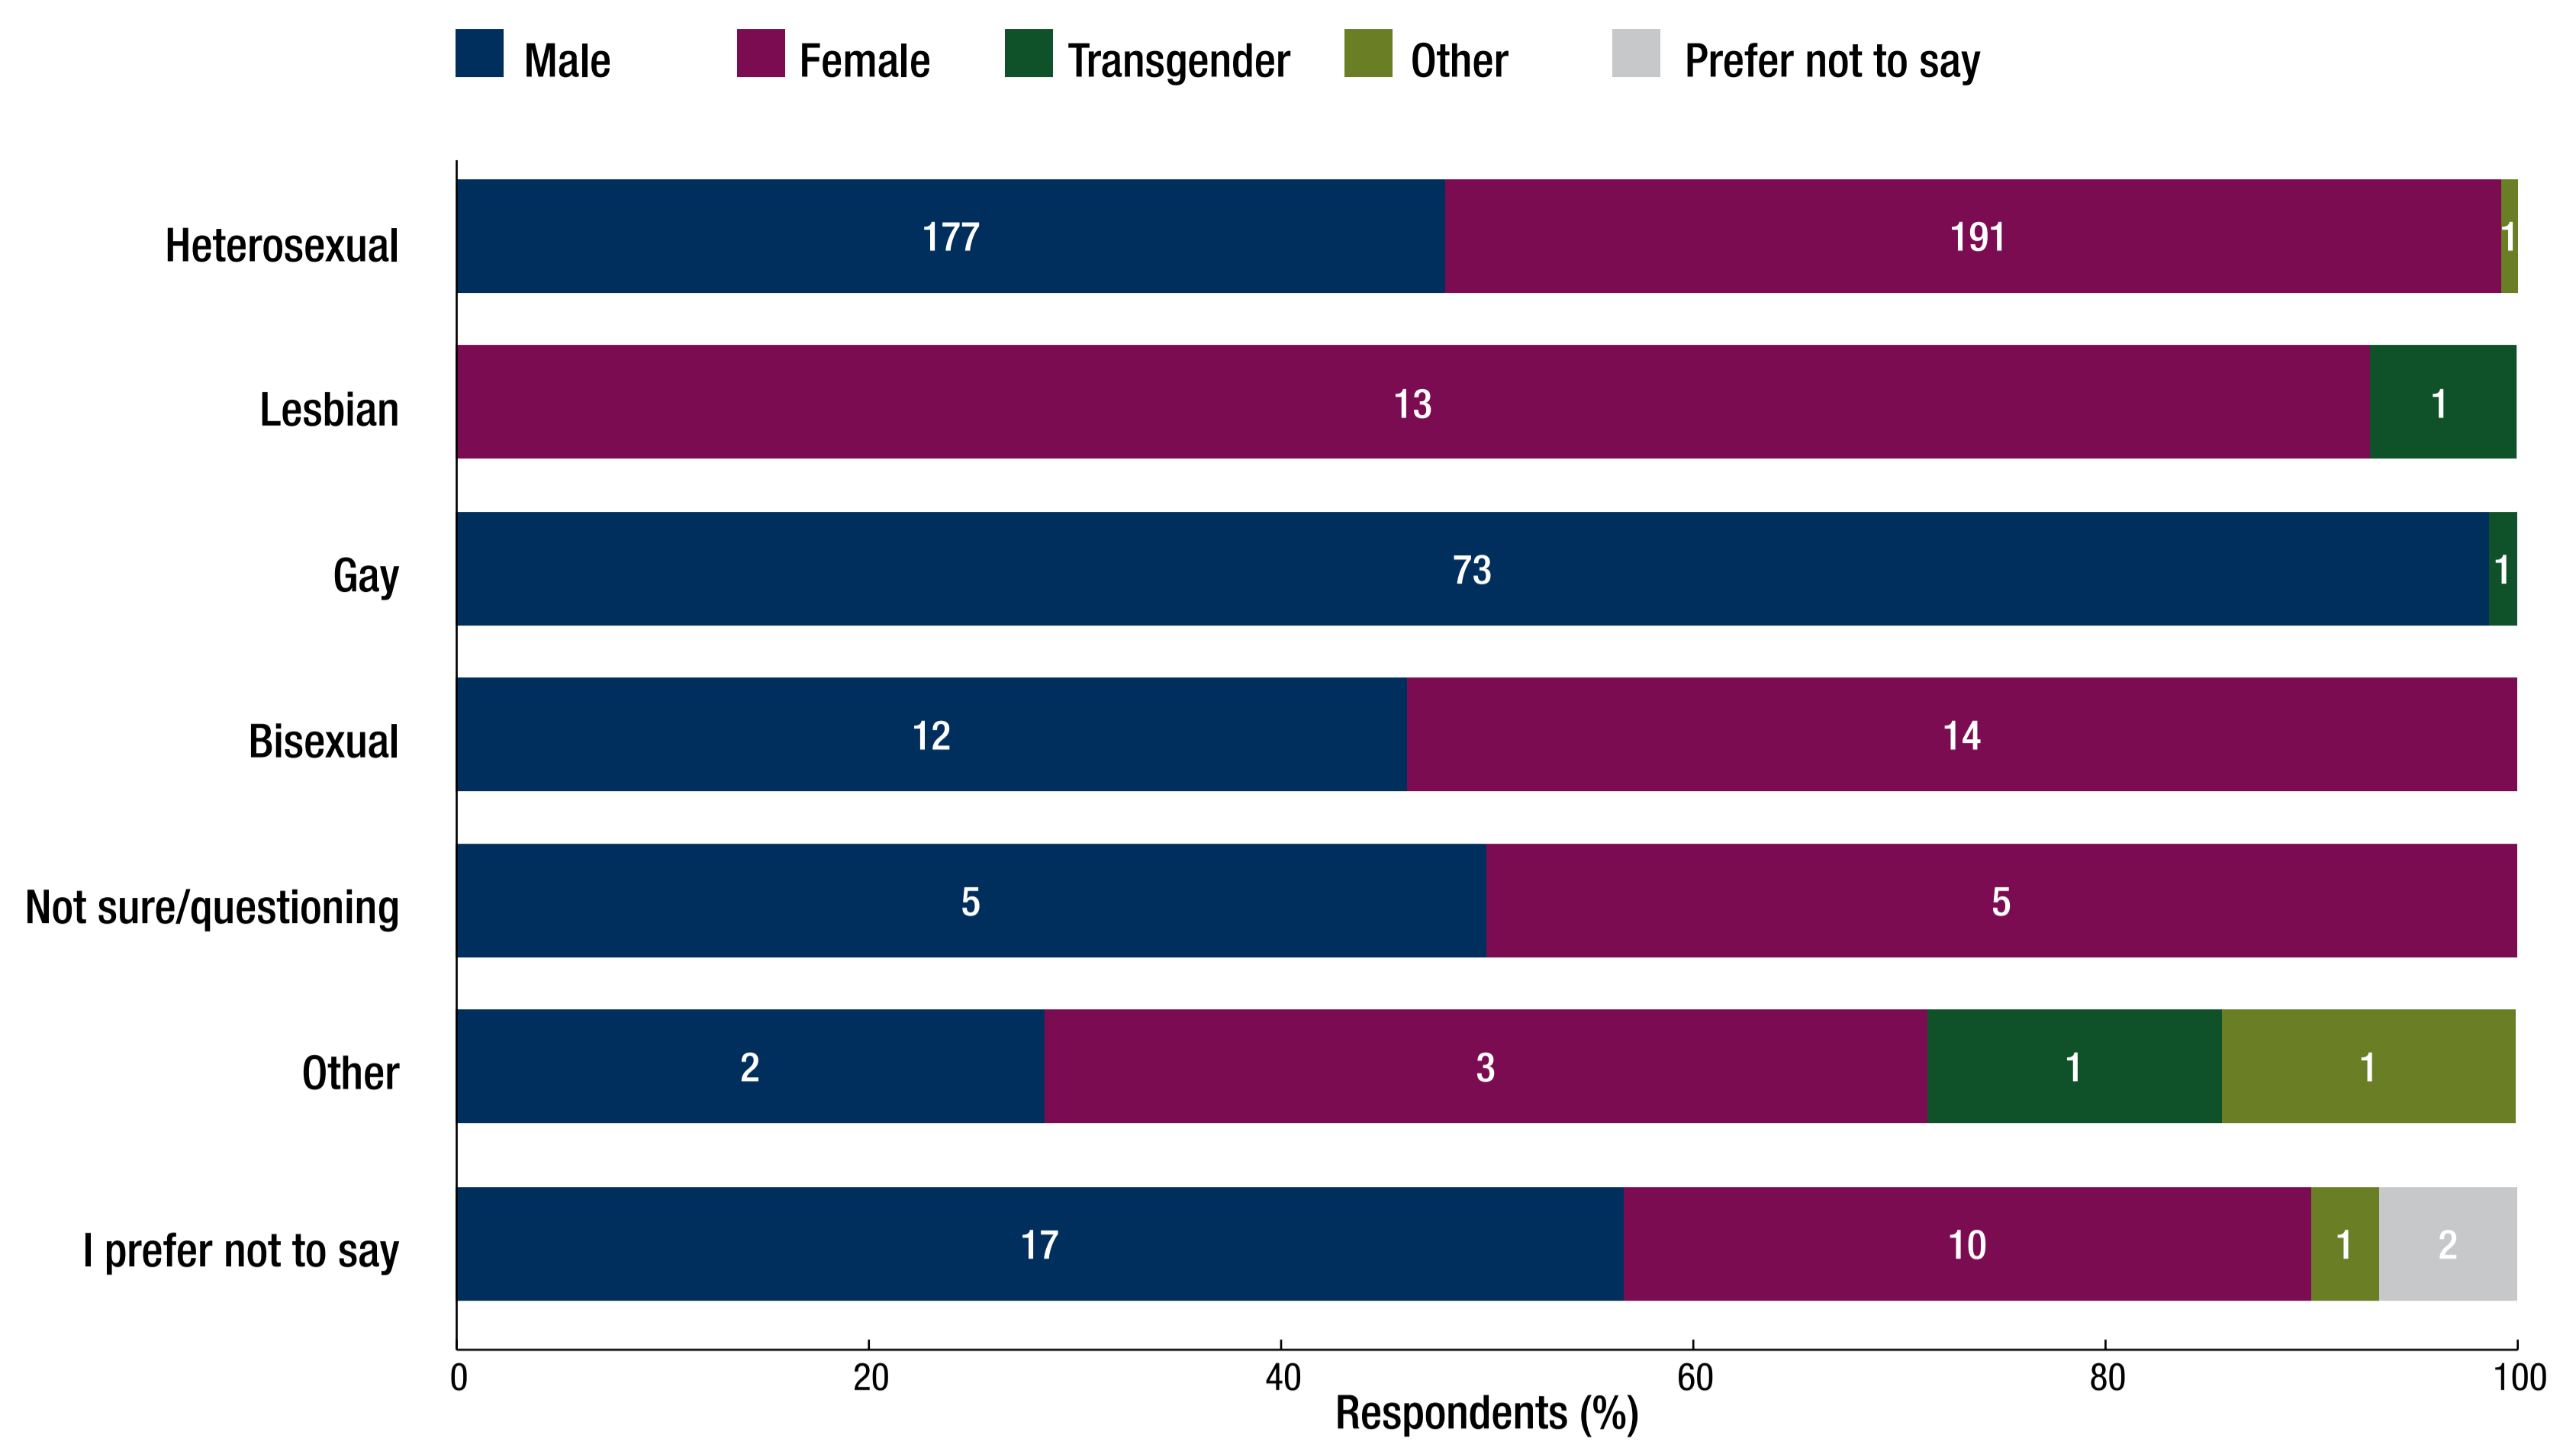

## S1B - Country of practice representing top 20 countries per number of respondents

|                                                         |             |
|---------------------------------------------------------|-------------|
| 1. Spain                                                | 56 (11,34%) |
| 2. Italy                                                | 44 (8,91%)  |
| 3. United Kingdom of Great Britain and Northern Ireland | 30 (6,07%)  |
| 4. Switzerland                                          | 23 (4,66%)  |
| 5. Germany                                              | 22 (4,45%)  |
| 6. Portugal                                             | 19 (3,85%)  |
| 7. France                                               | 19 (3,85%)  |
| 8. India                                                | 16 (3,24%)  |
| 9. Greece                                               | 15 (3,04%)  |
| 10. Philippines                                         | 15 (3,04%)  |
| 11. Belgium                                             | 14 (2,83%)  |
| 12. Brazil                                              | 14 (2,83%)  |
| 13. Ukraine                                             | 12 (2,43%)  |
| 14. Poland                                              | 12 (2,43%)  |
| 15. Russian Federation                                  | 11 (2,23%)  |
| 16. Romania                                             | 10 (2,02%)  |
| 17. Netherlands                                         | 9 (1,82%)   |
| 18. Egypt                                               | 7 (1,42%)   |
| 19. Mexico                                              | 7 (1,42%)   |
| 20. United States of America                            | 7 (1,42%)   |

## S1C - Sexual orientation subgroups of respondents who feel comfortable when treating transgender patients with cancer

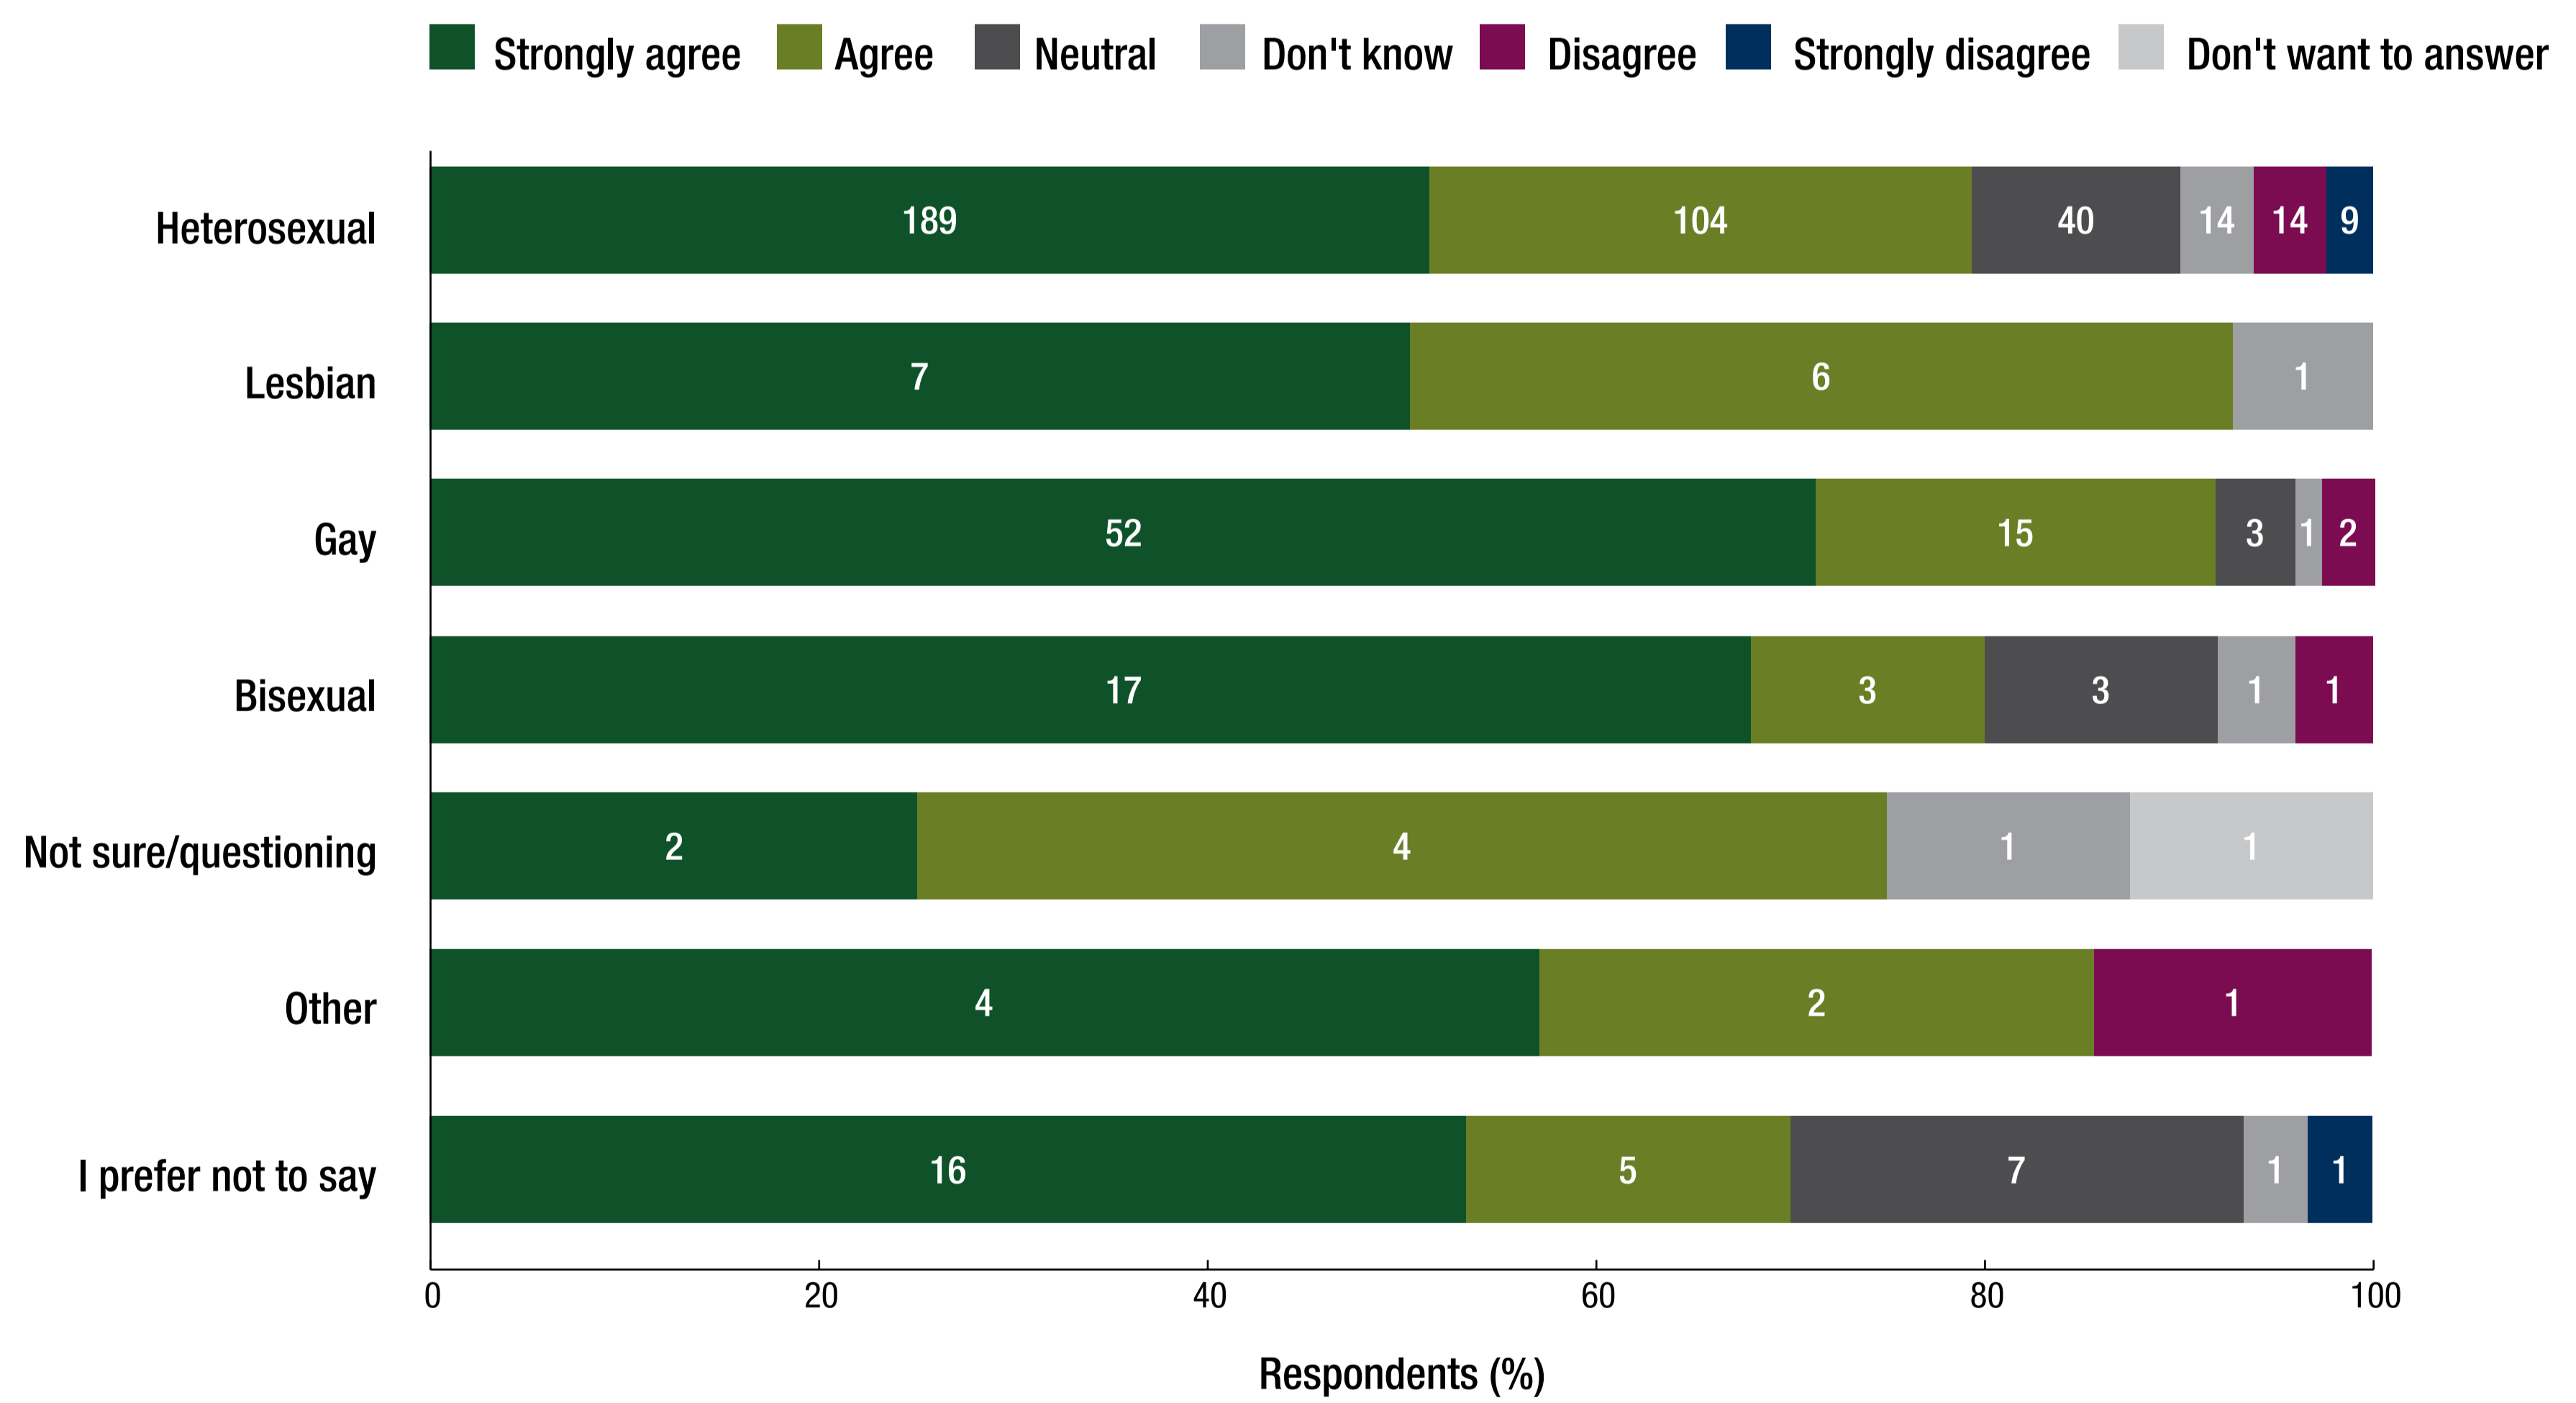

## S1D - Sexual orientation subgroups of respondents who find more difficult to treat LGBTQ patients with cancer

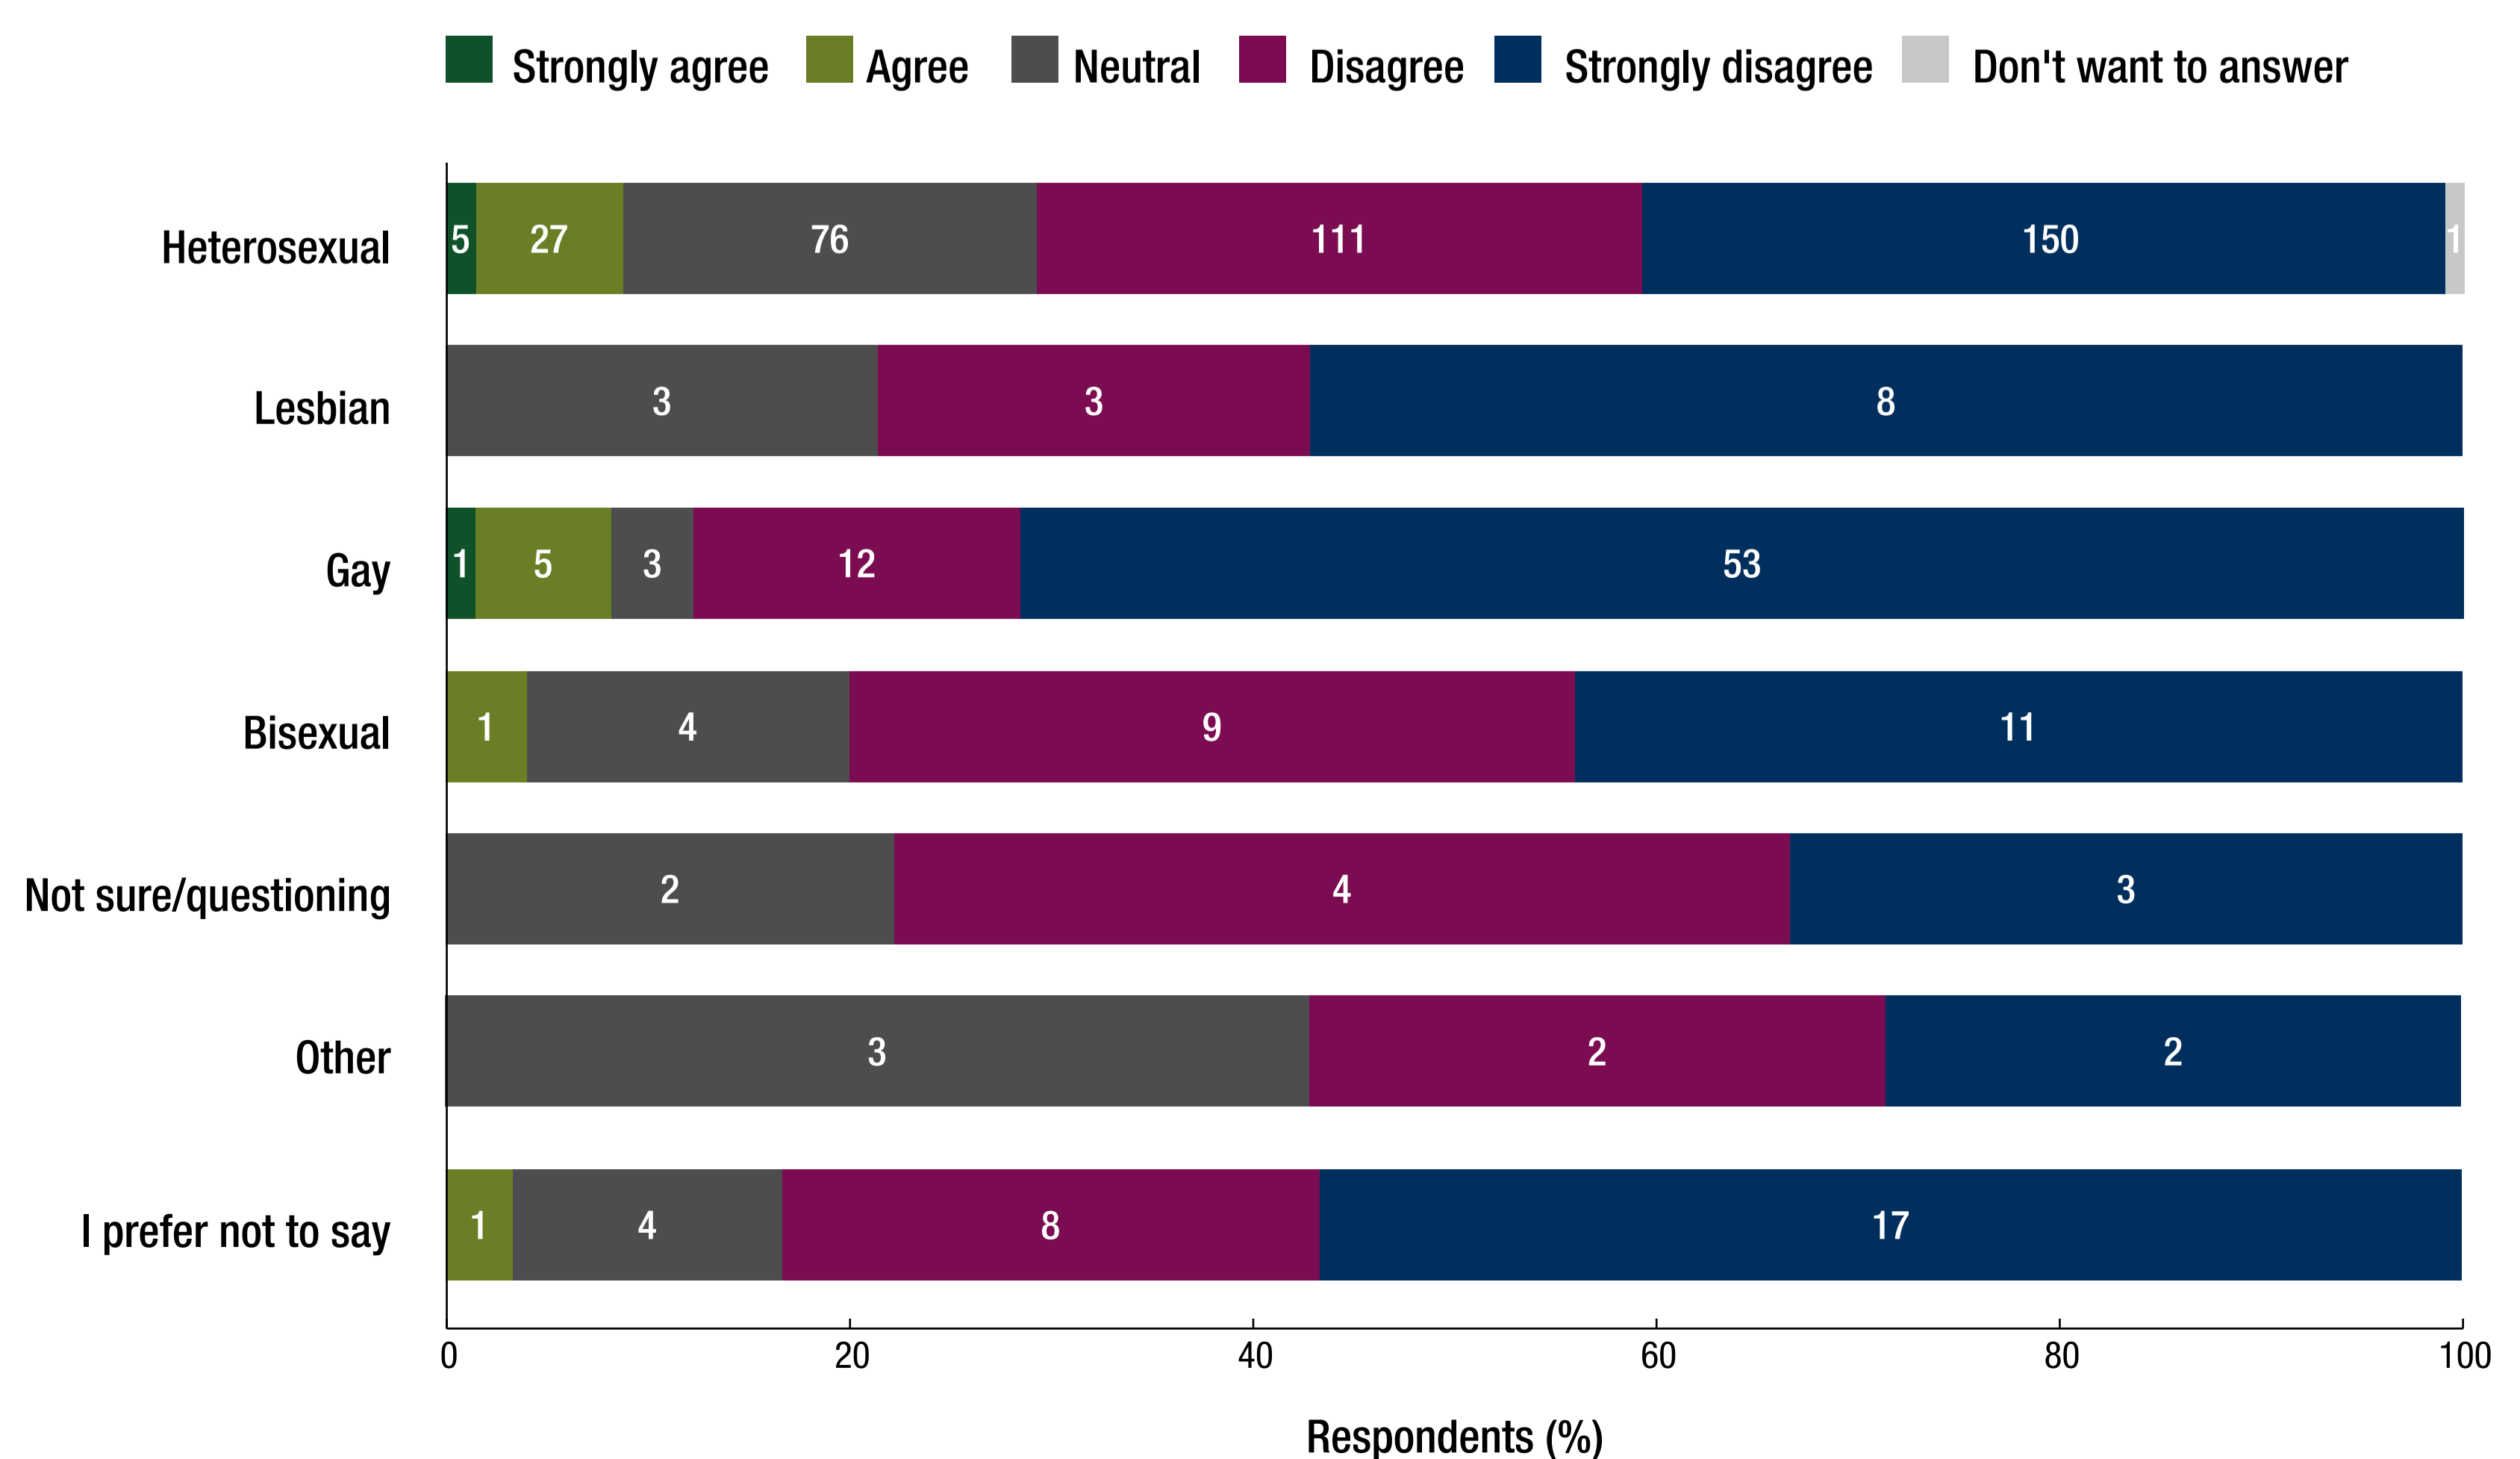

Supplement: mmc1.pdf [file mmc1.pdf]
