# Supplementary material for: An assessment of the attitudes, knowledge, and education regarding the health care needs of LGBTQ patients with cancer: results of an ESMO/SIOPE global survey
Source: PubMed Central journal article supplement — ESMO Open. 2024 Jun 30;9(8):103618. doi: 10.1016/j.esmoop.2024.103618 (PMC11410726; doi:10.1016/j.esmoop.2024.103618), 2024-06-30

# Supplementary Figure 2. Respondent beliefs regarding health needs of LGBTQ patients

## S2A - Sexual orientation subgroups of respondents who believe that LGBTQ people are disadvantaged in accessing cancer care

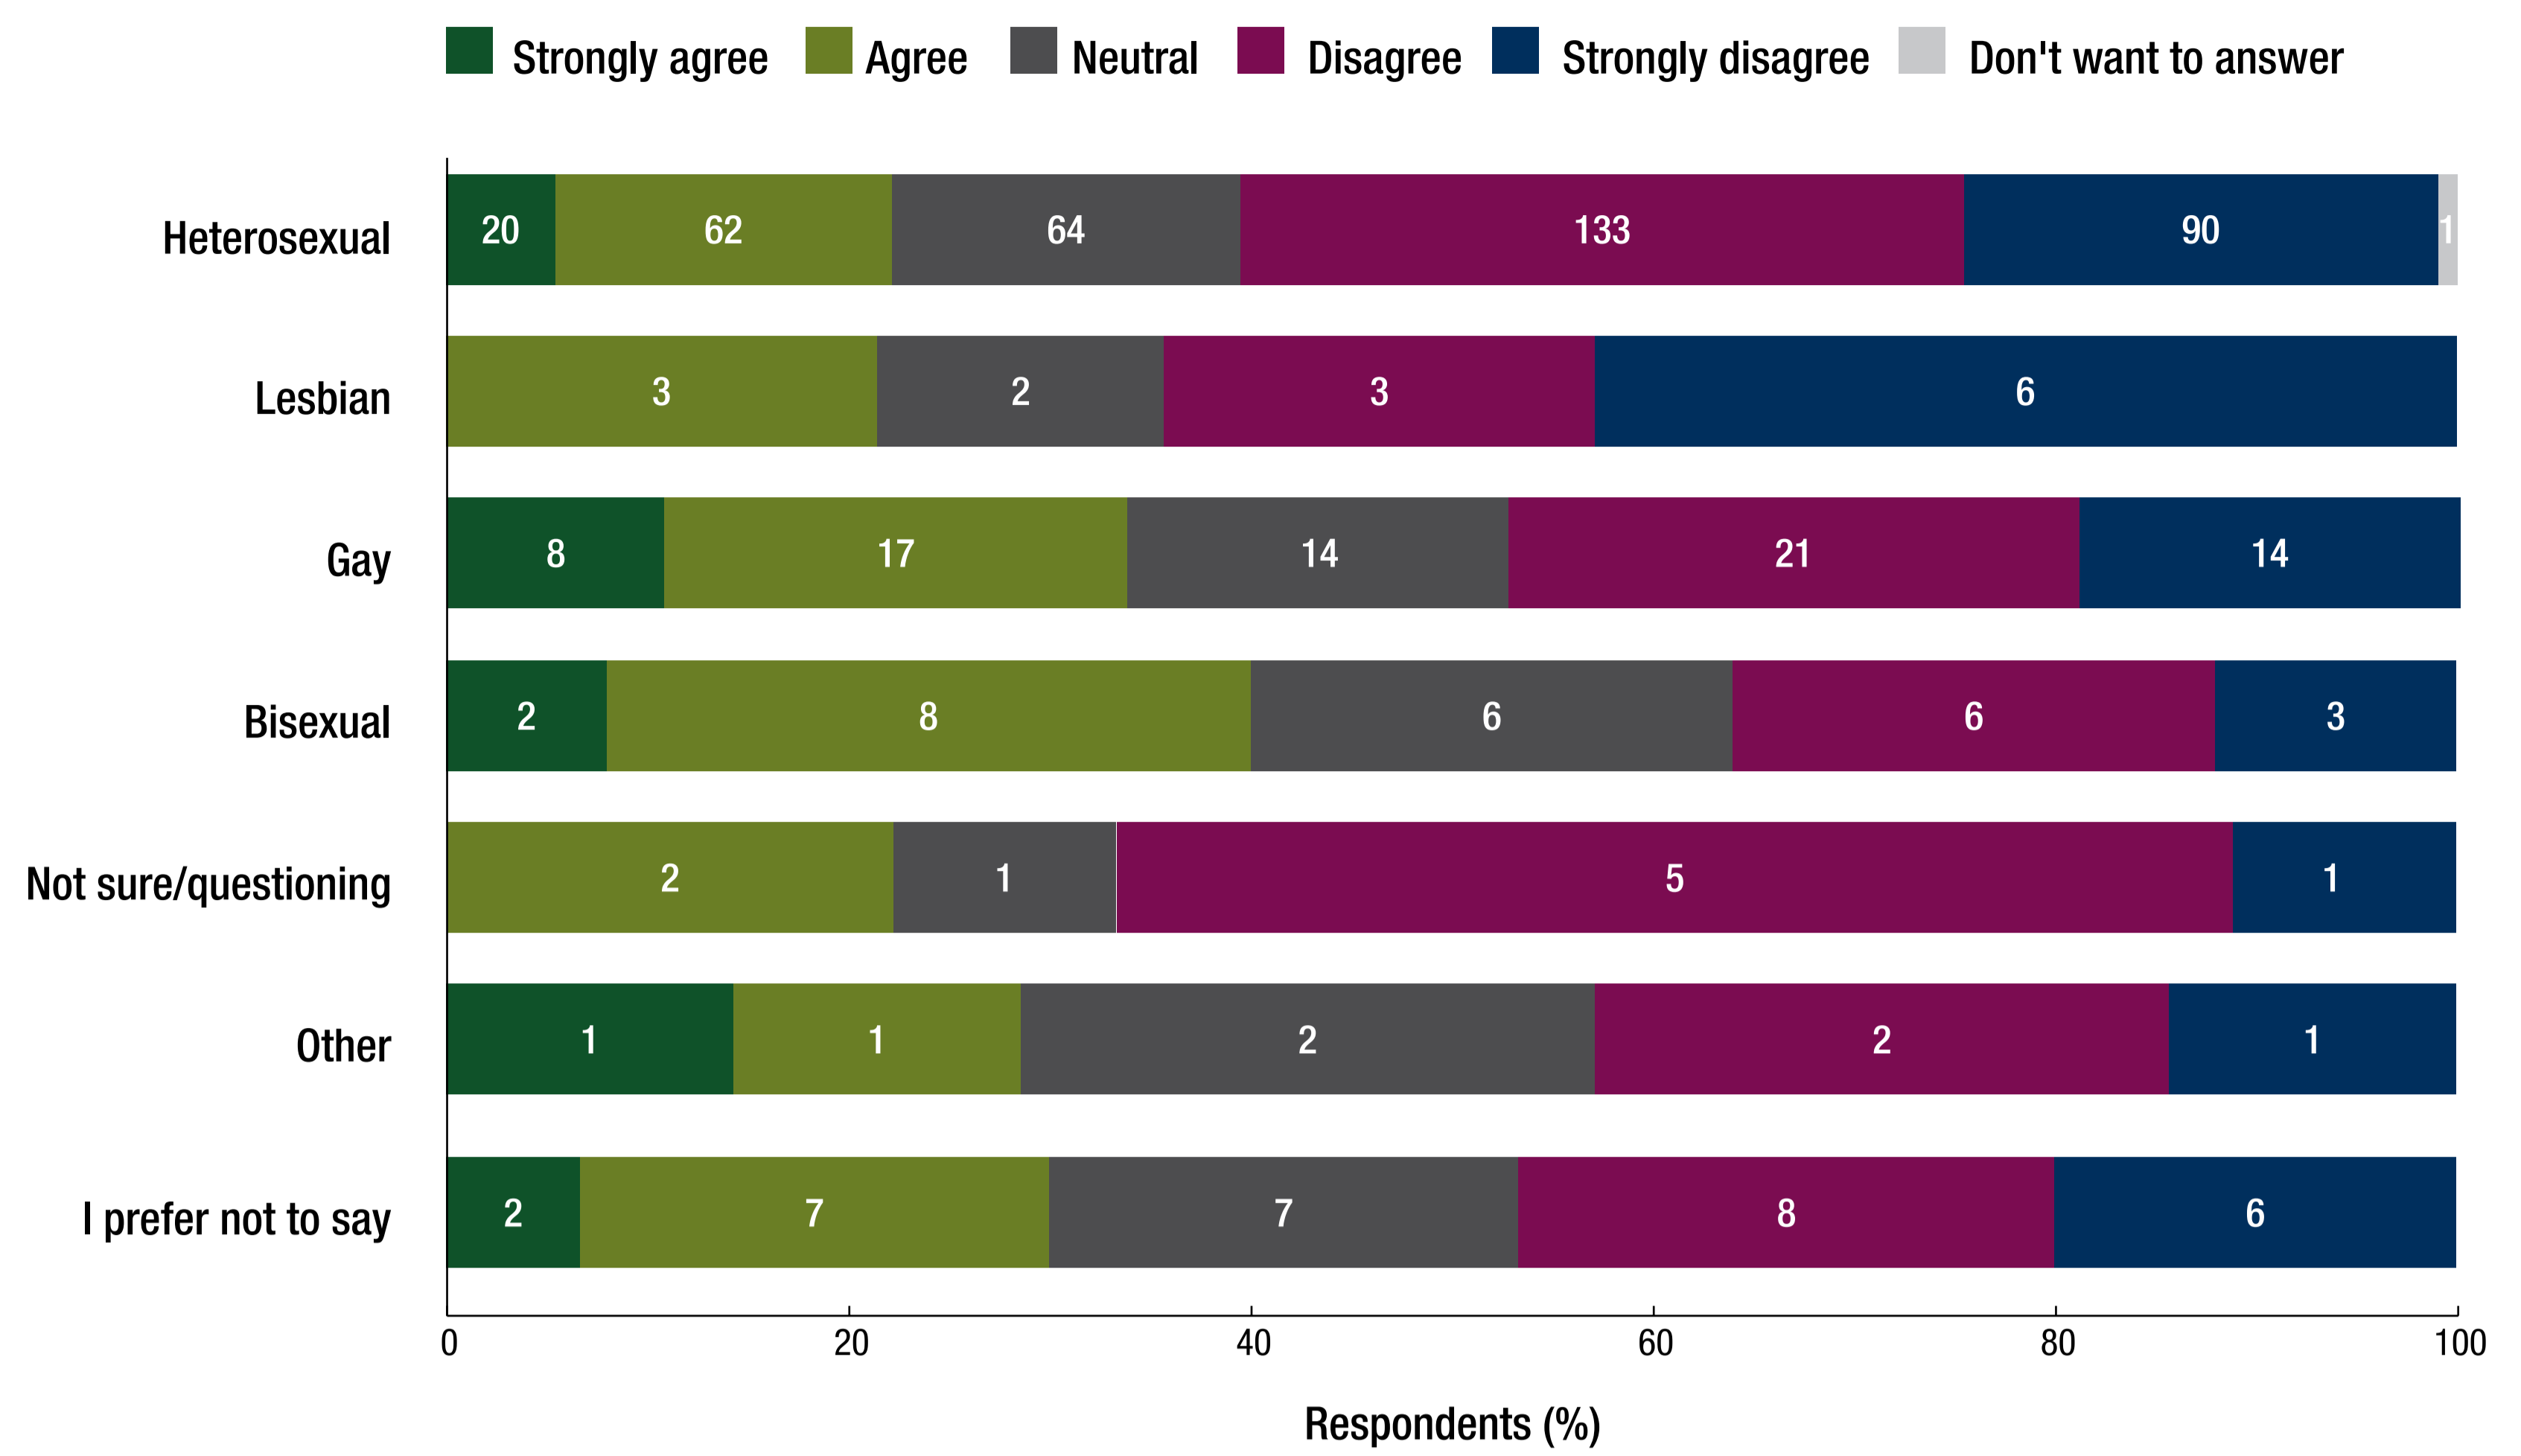

## S2B - Sexual orientation subgroups of respondents who feel well informed about psycho-social specificities of LGBTQ patients

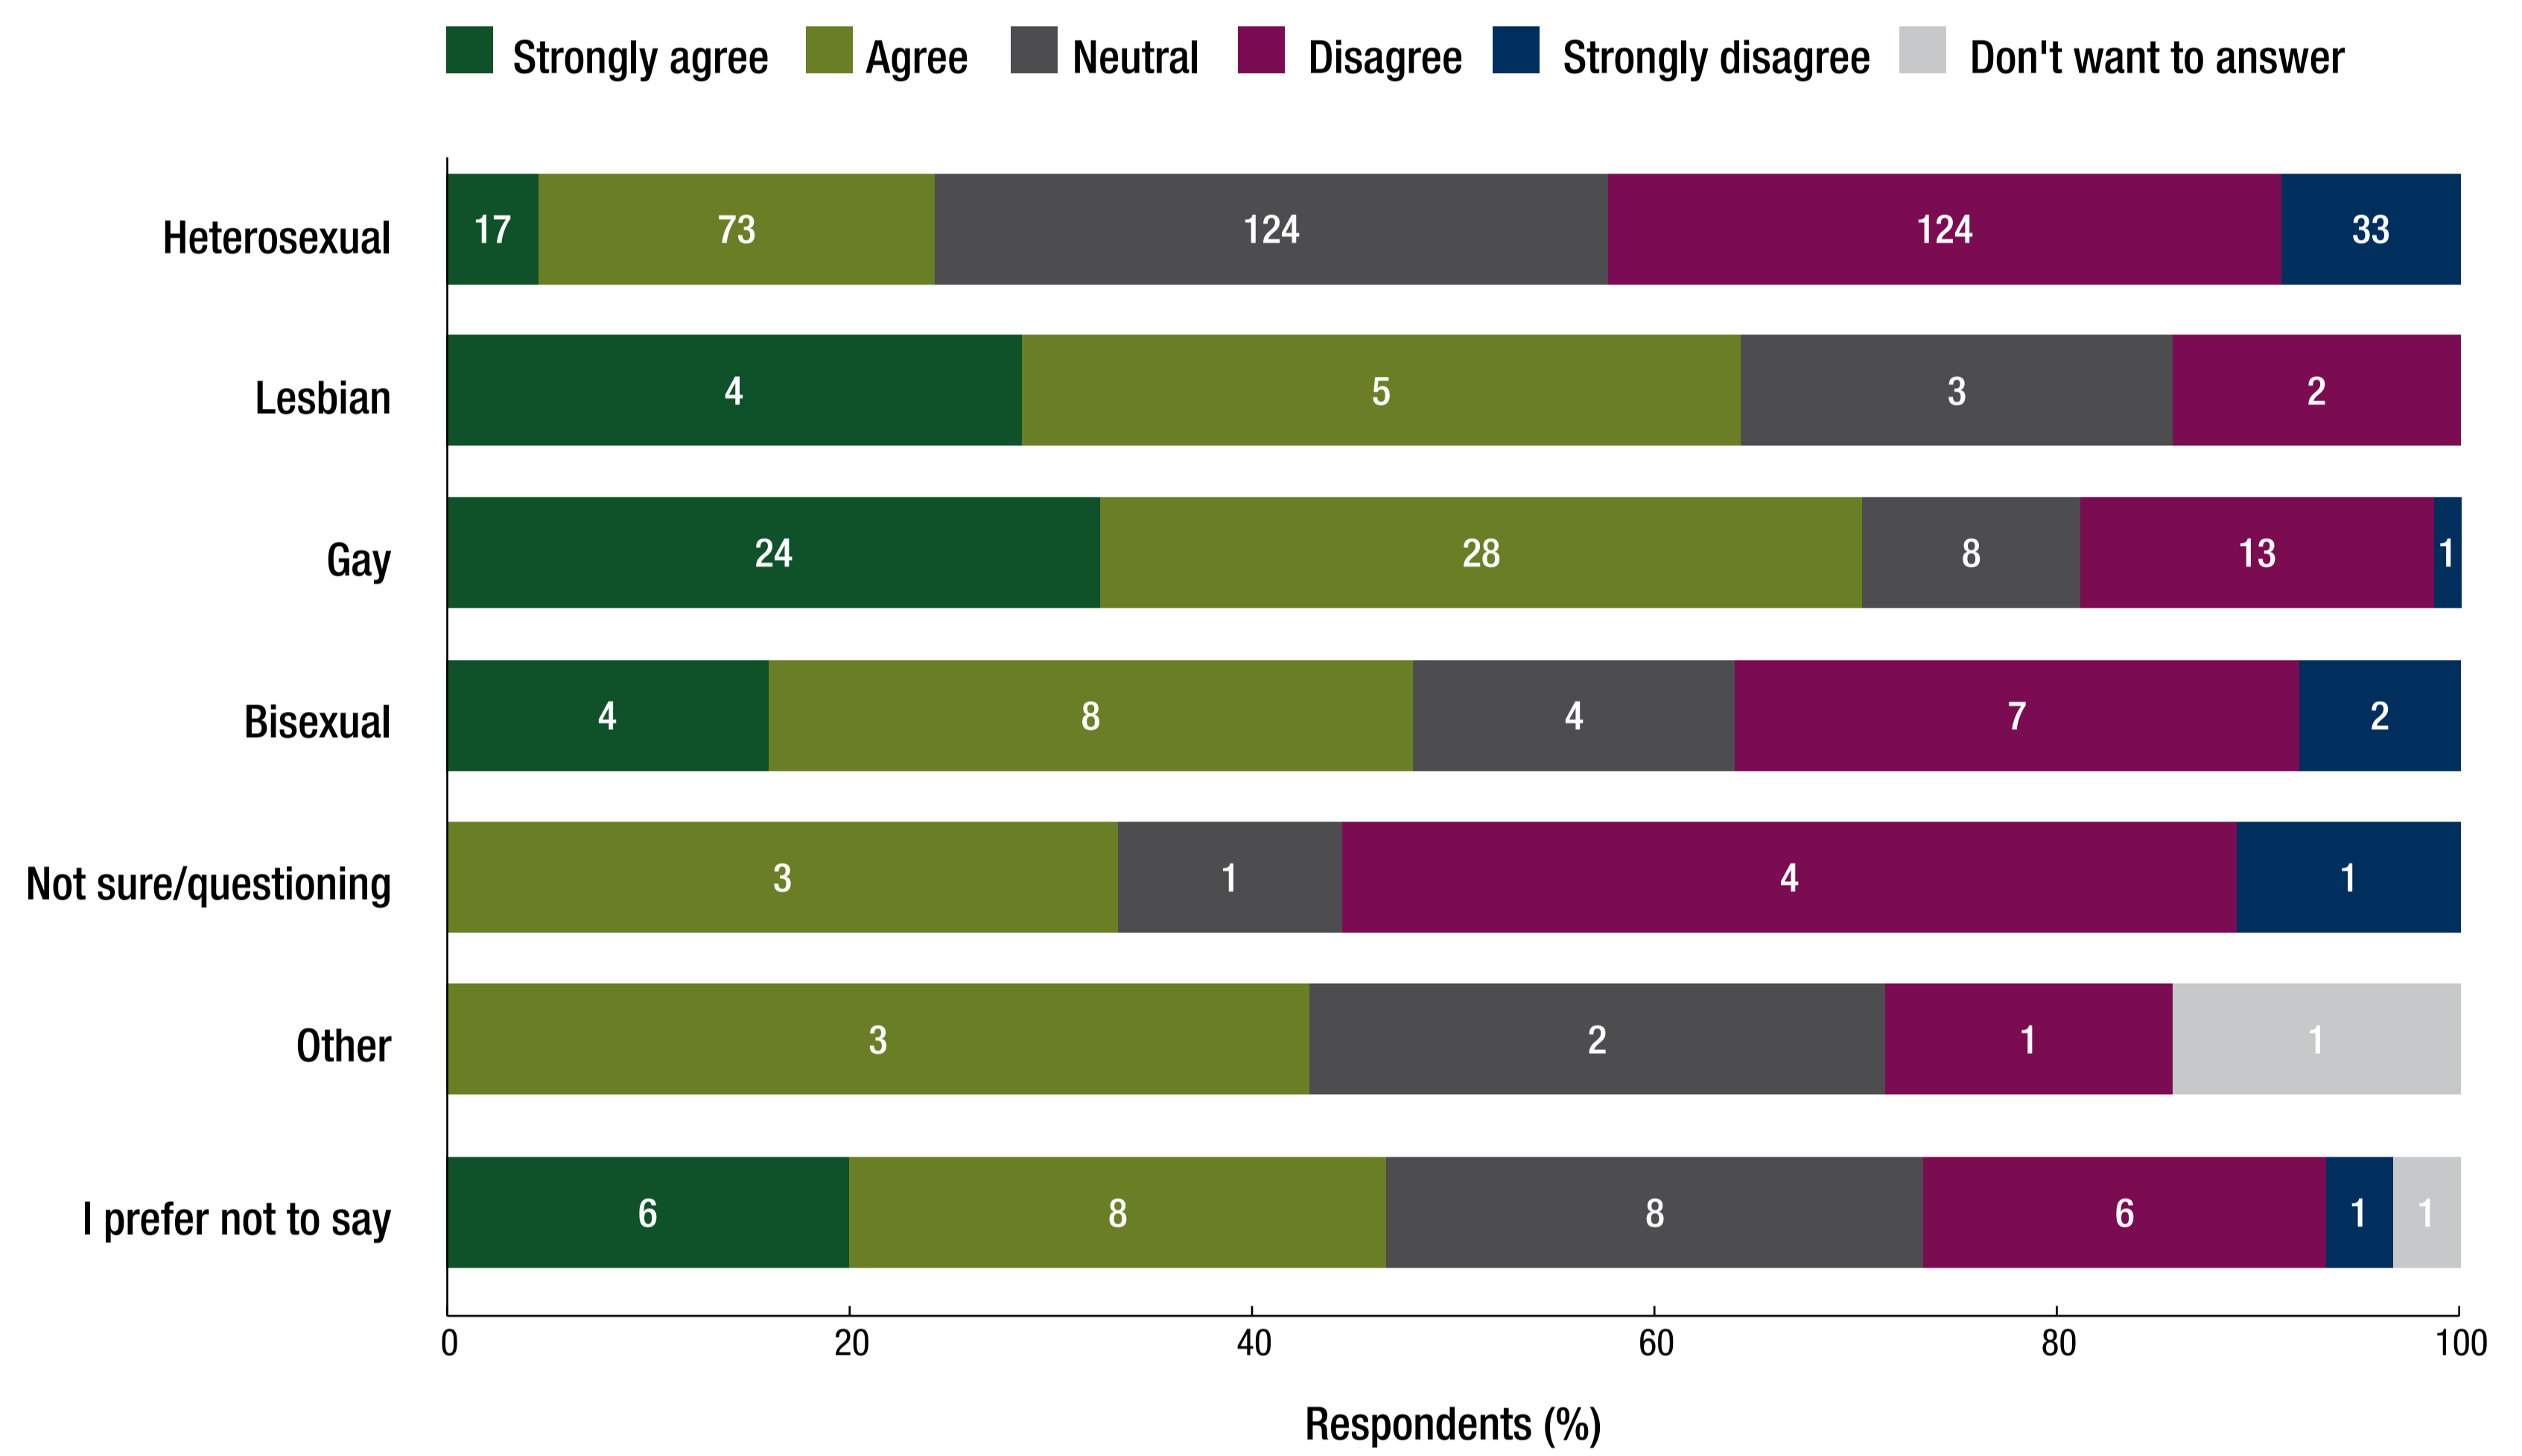

## S2C - Percentage of respondents who think that the cancer risk differs with sexual orientation

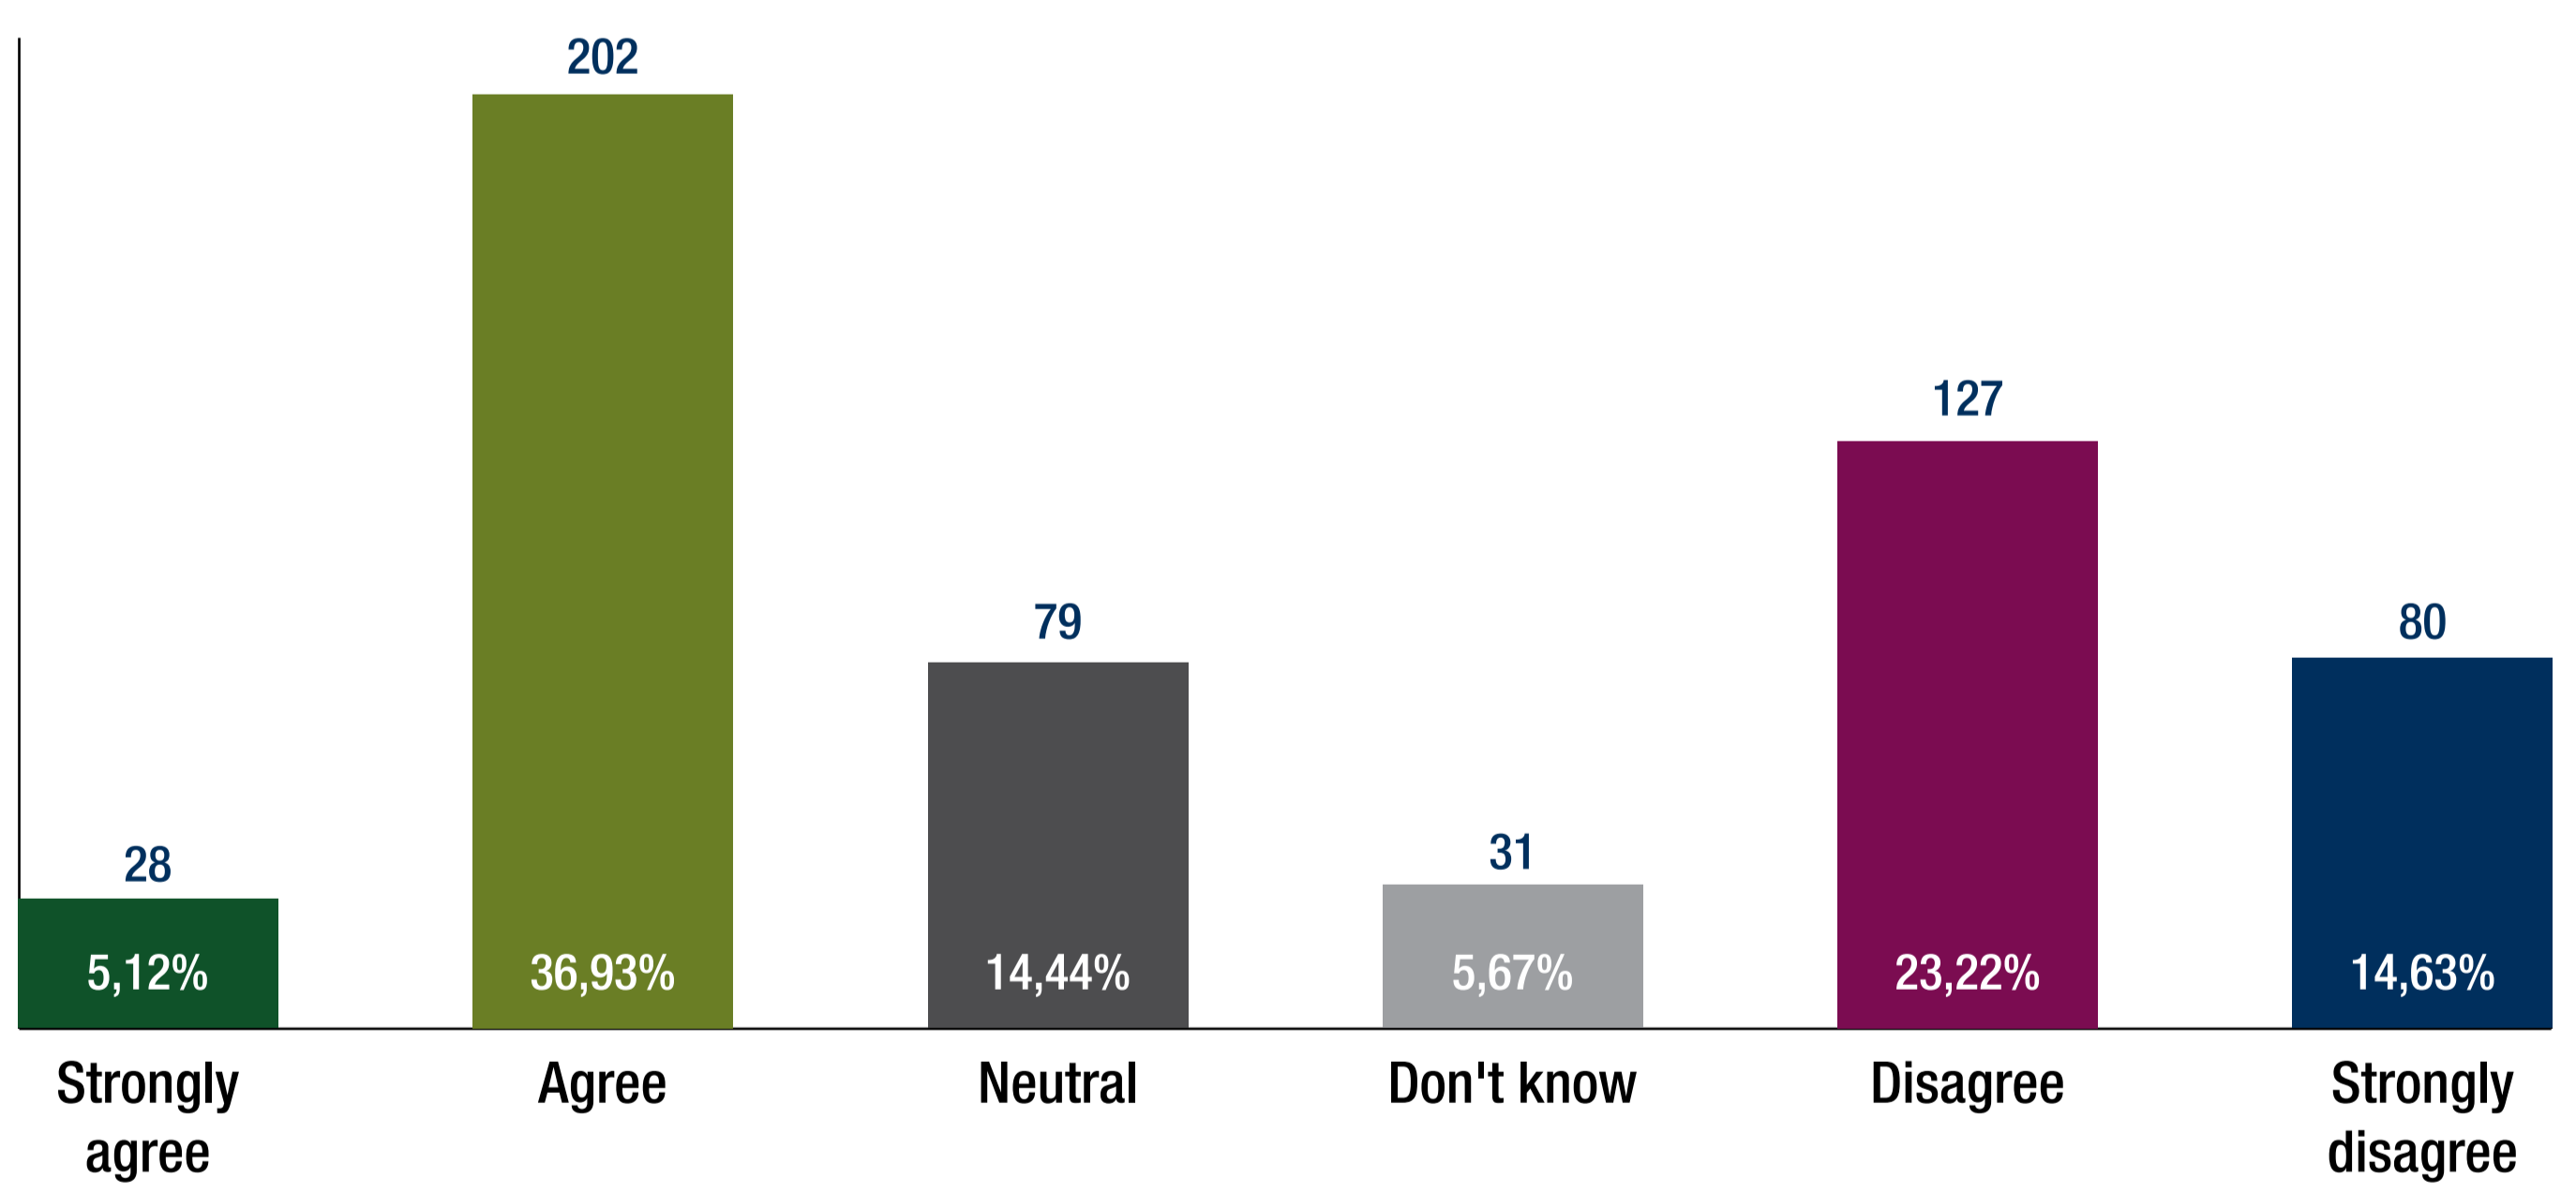

## S2D - Sexual orientation subgroups of respondents who believe that lesbian women are not at risk for HPV-associated cervical dysplasia

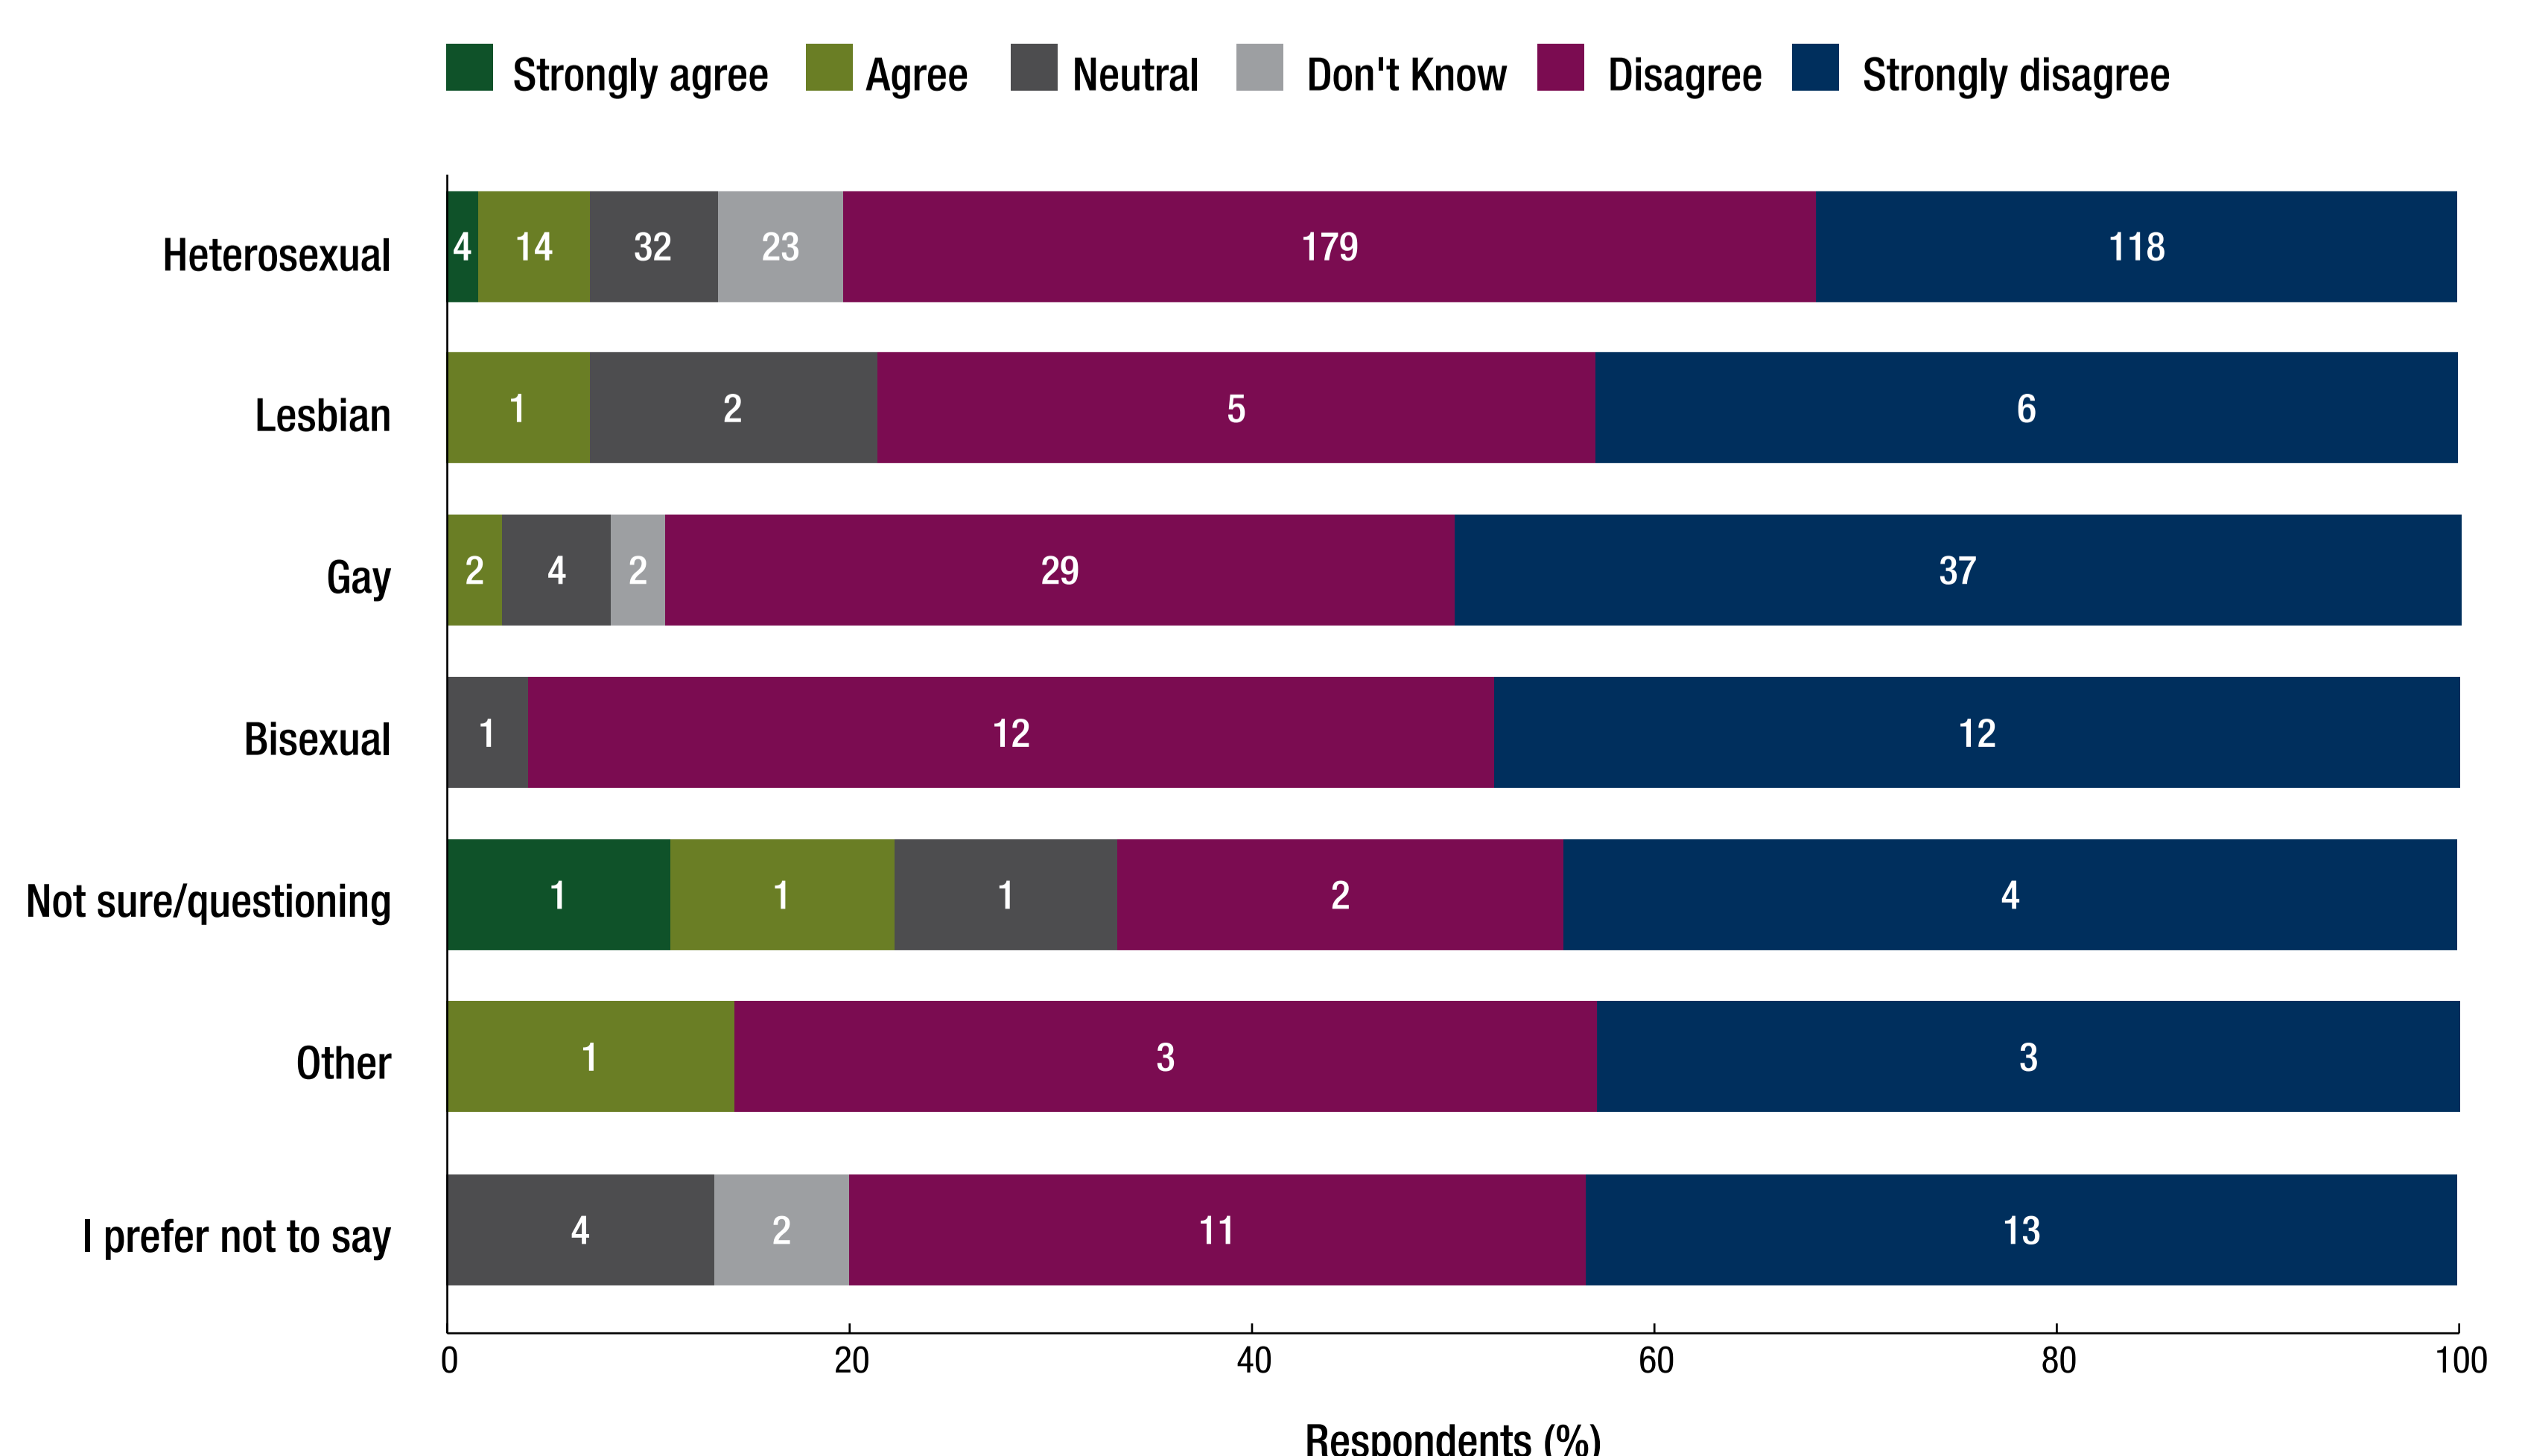

Supplement: mmc2.pdf [file mmc2.pdf]
