# Supplementary material for: An assessment of the attitudes, knowledge, and education regarding the health care needs of LGBTQ patients with cancer: results of an ESMO/SIOPE global survey
Source: PubMed Central journal article supplement — ESMO Open. 2024 Jun 30;9(8):103618. doi: 10.1016/j.esmoop.2024.103618 (PMC11410726; doi:10.1016/j.esmoop.2024.103618), 2024-06-30

# Supplementary Figure 3. Respondent beliefs regarding lifestyle and risk of cancer among LGBTQ population

## S3A - Sexual orientation subgroups of respondents who believe that lesbian and bisexual women are at lower risk for breast and ovarian cancer

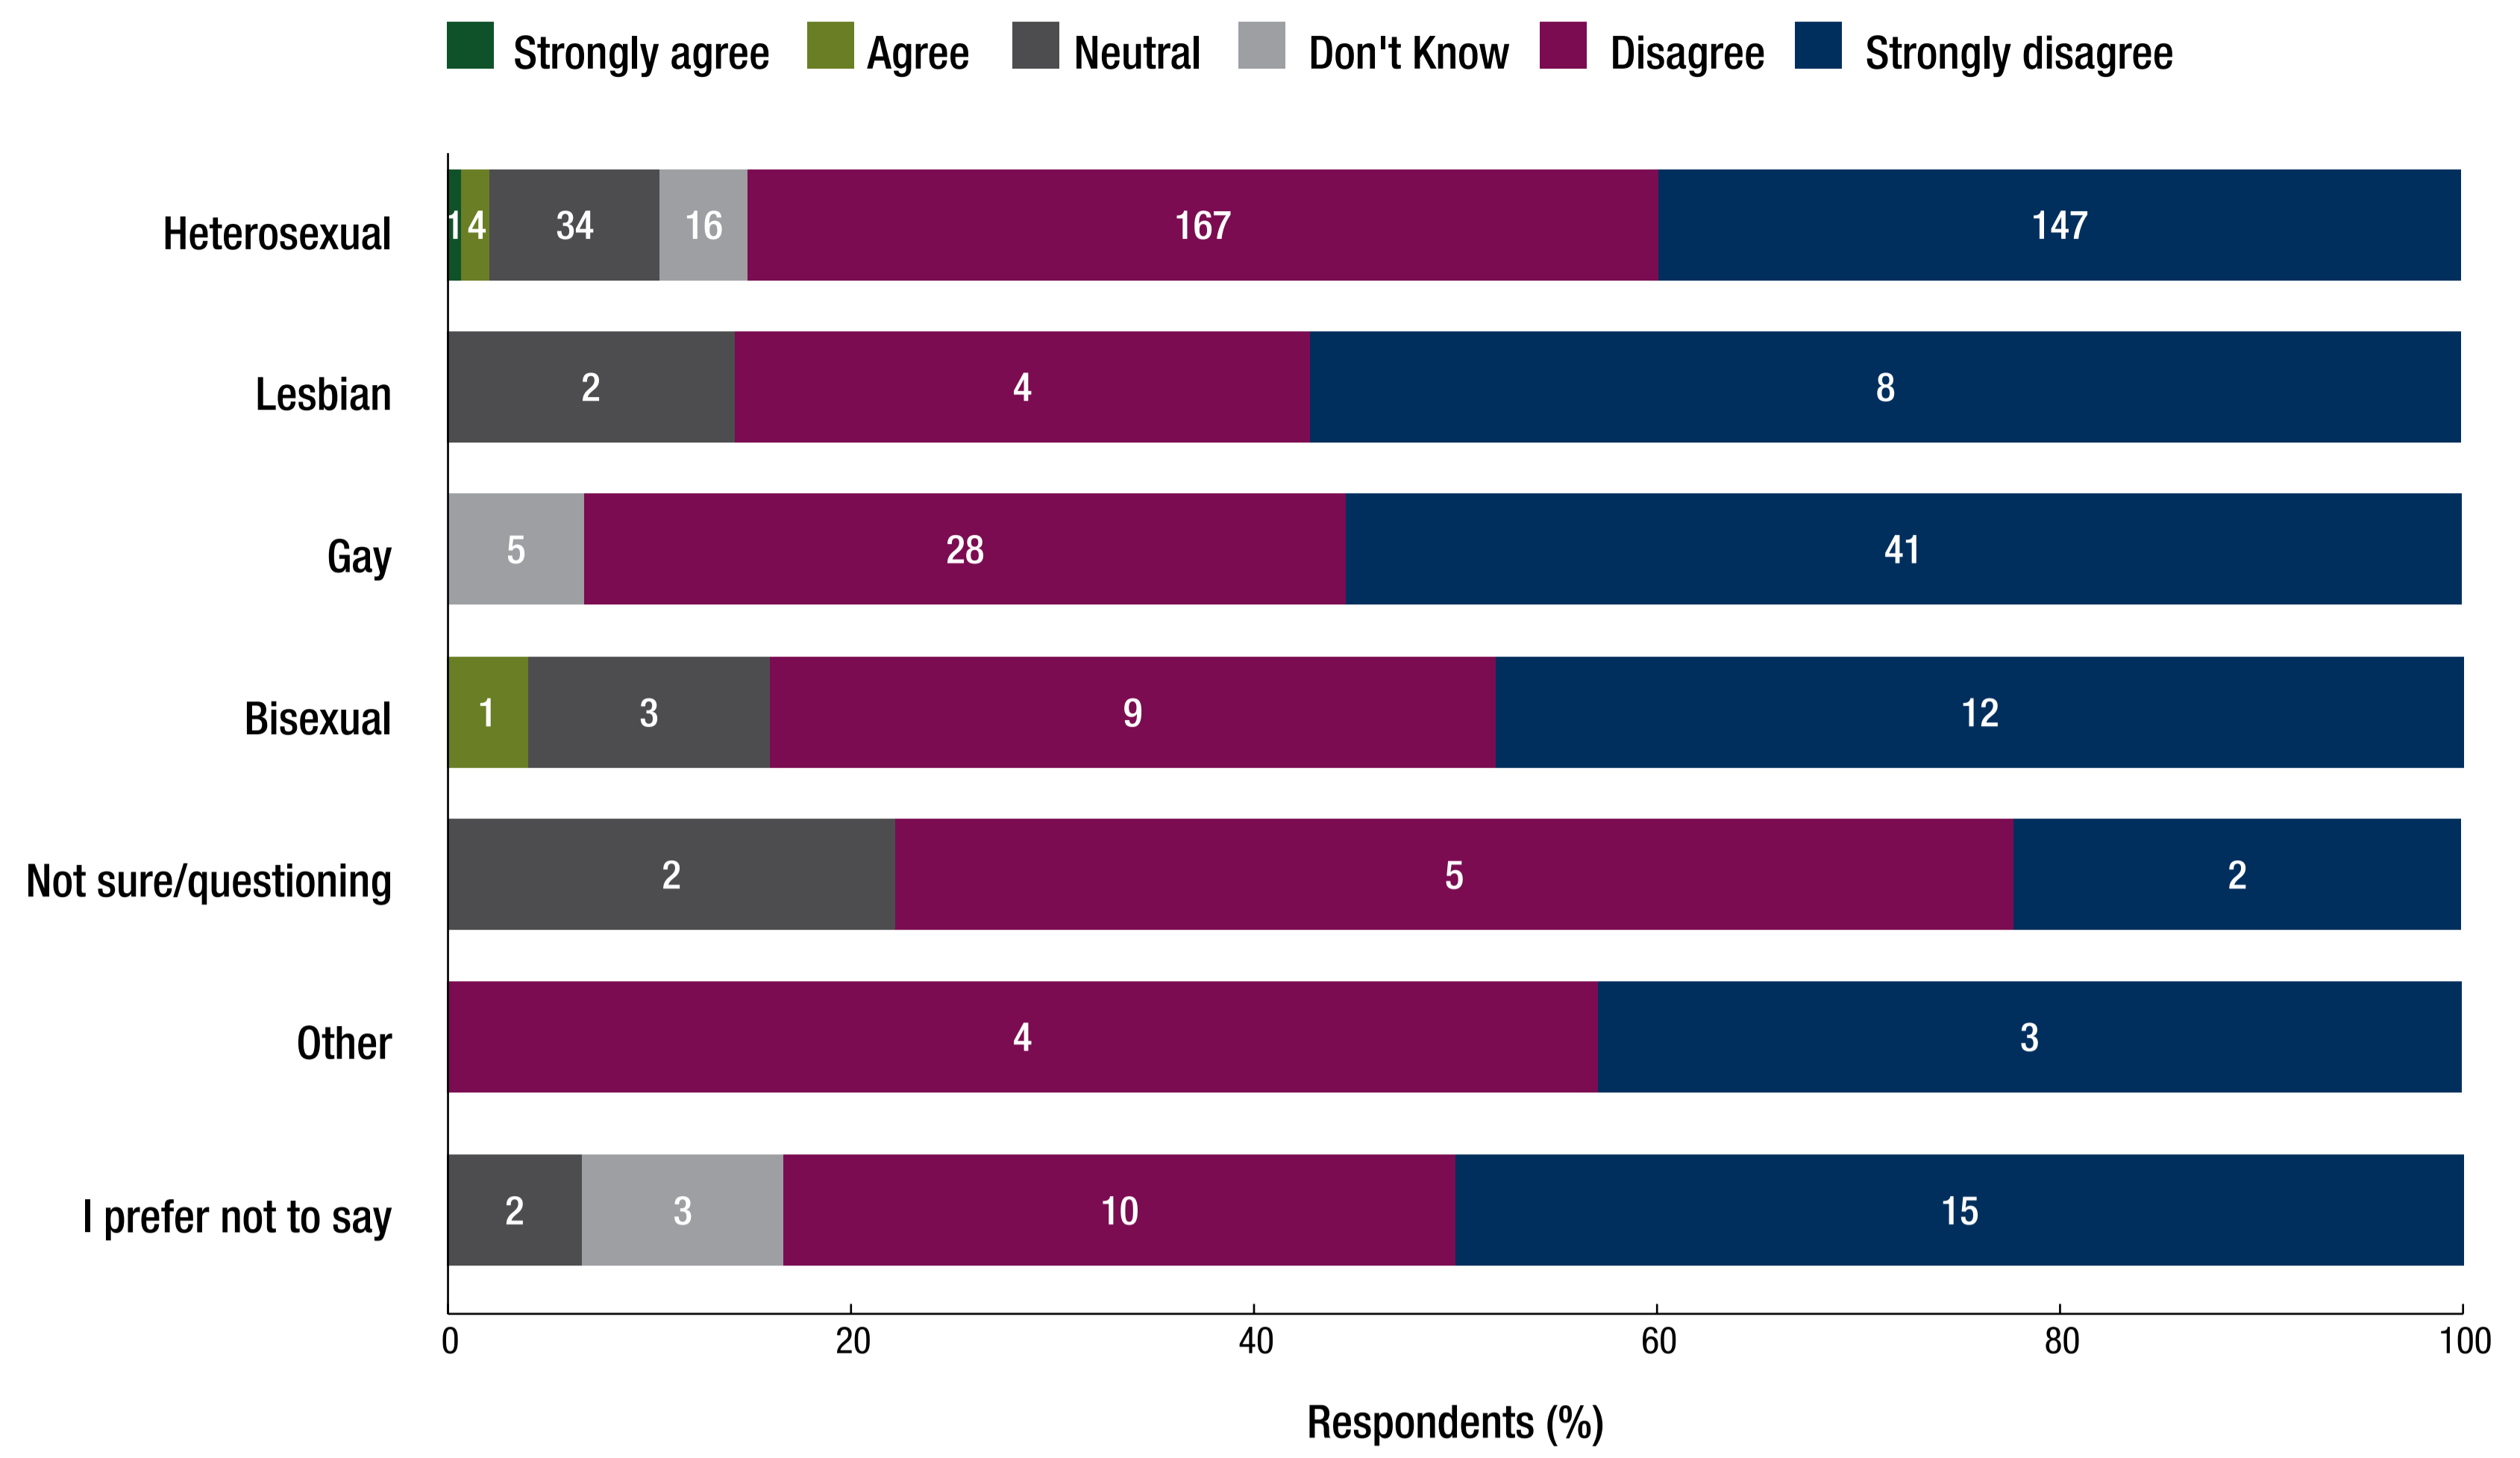

## S3B - Sexual orientation subgroups of respondents who believe that only HIV positive gay and bisexual men are at increased risk of anal cancer

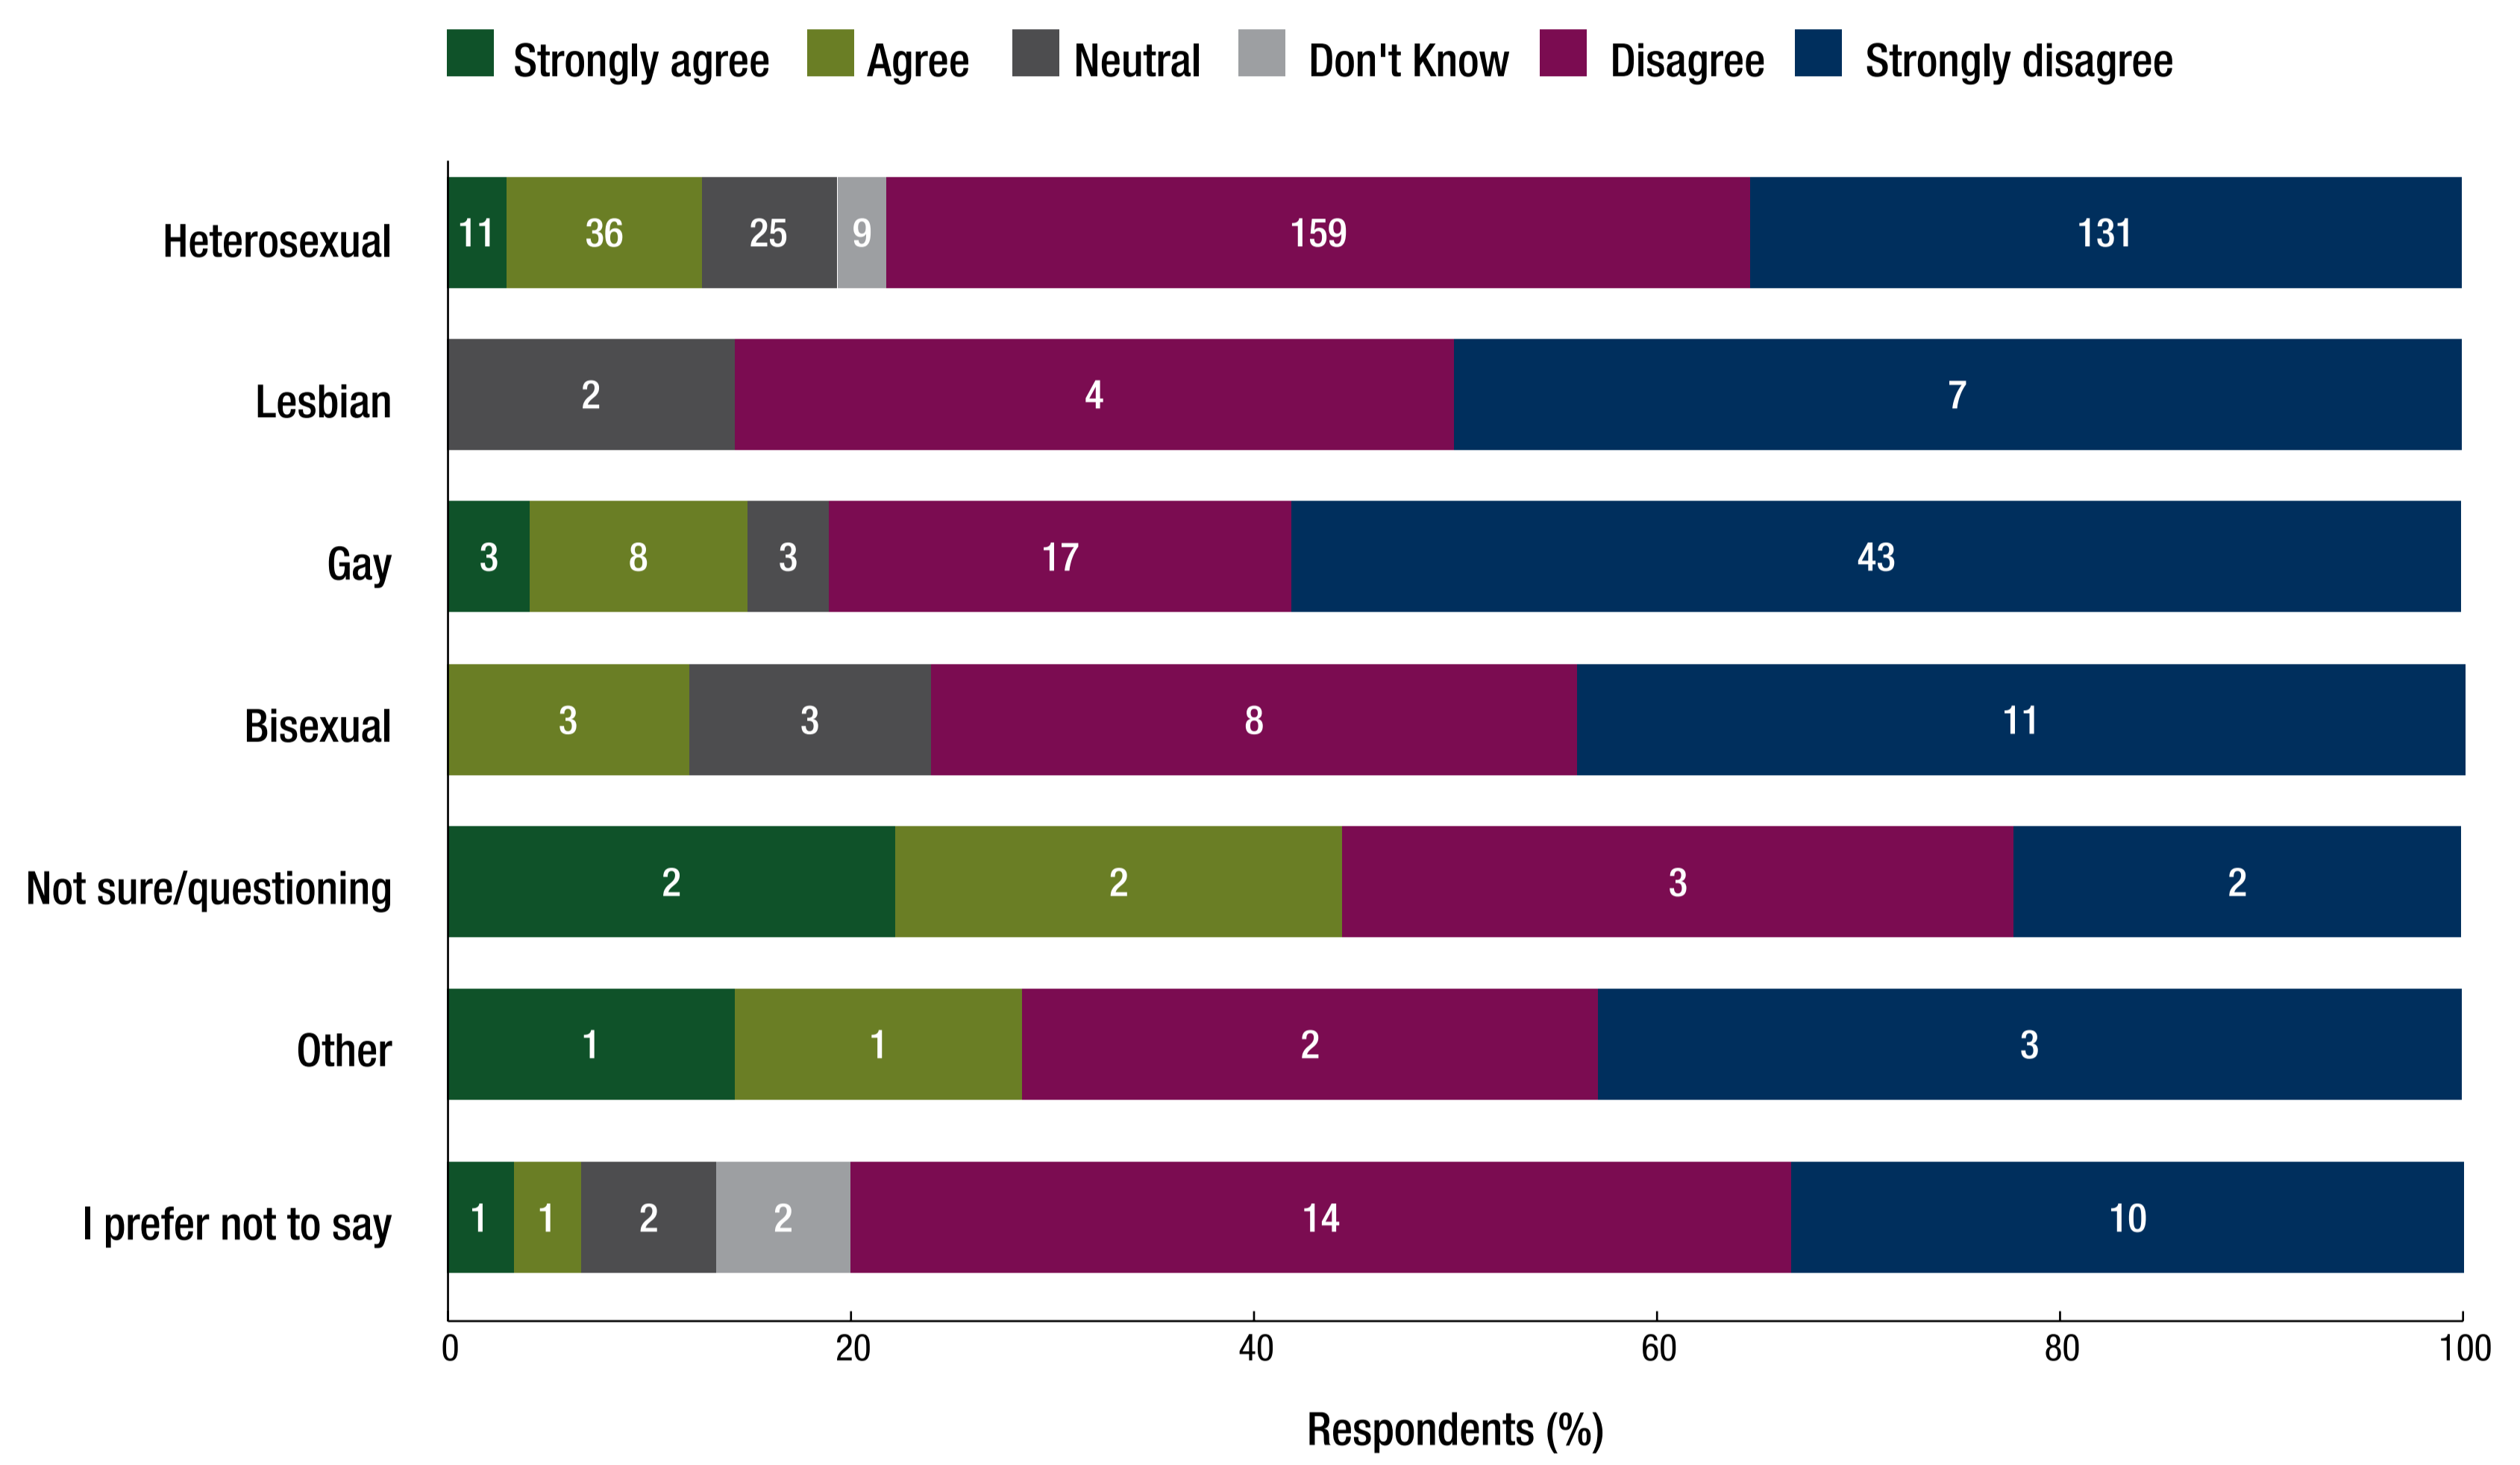

## S3C - Sexual orientation subgroups of respondents who believe that anal Pap testing increases life expectancy

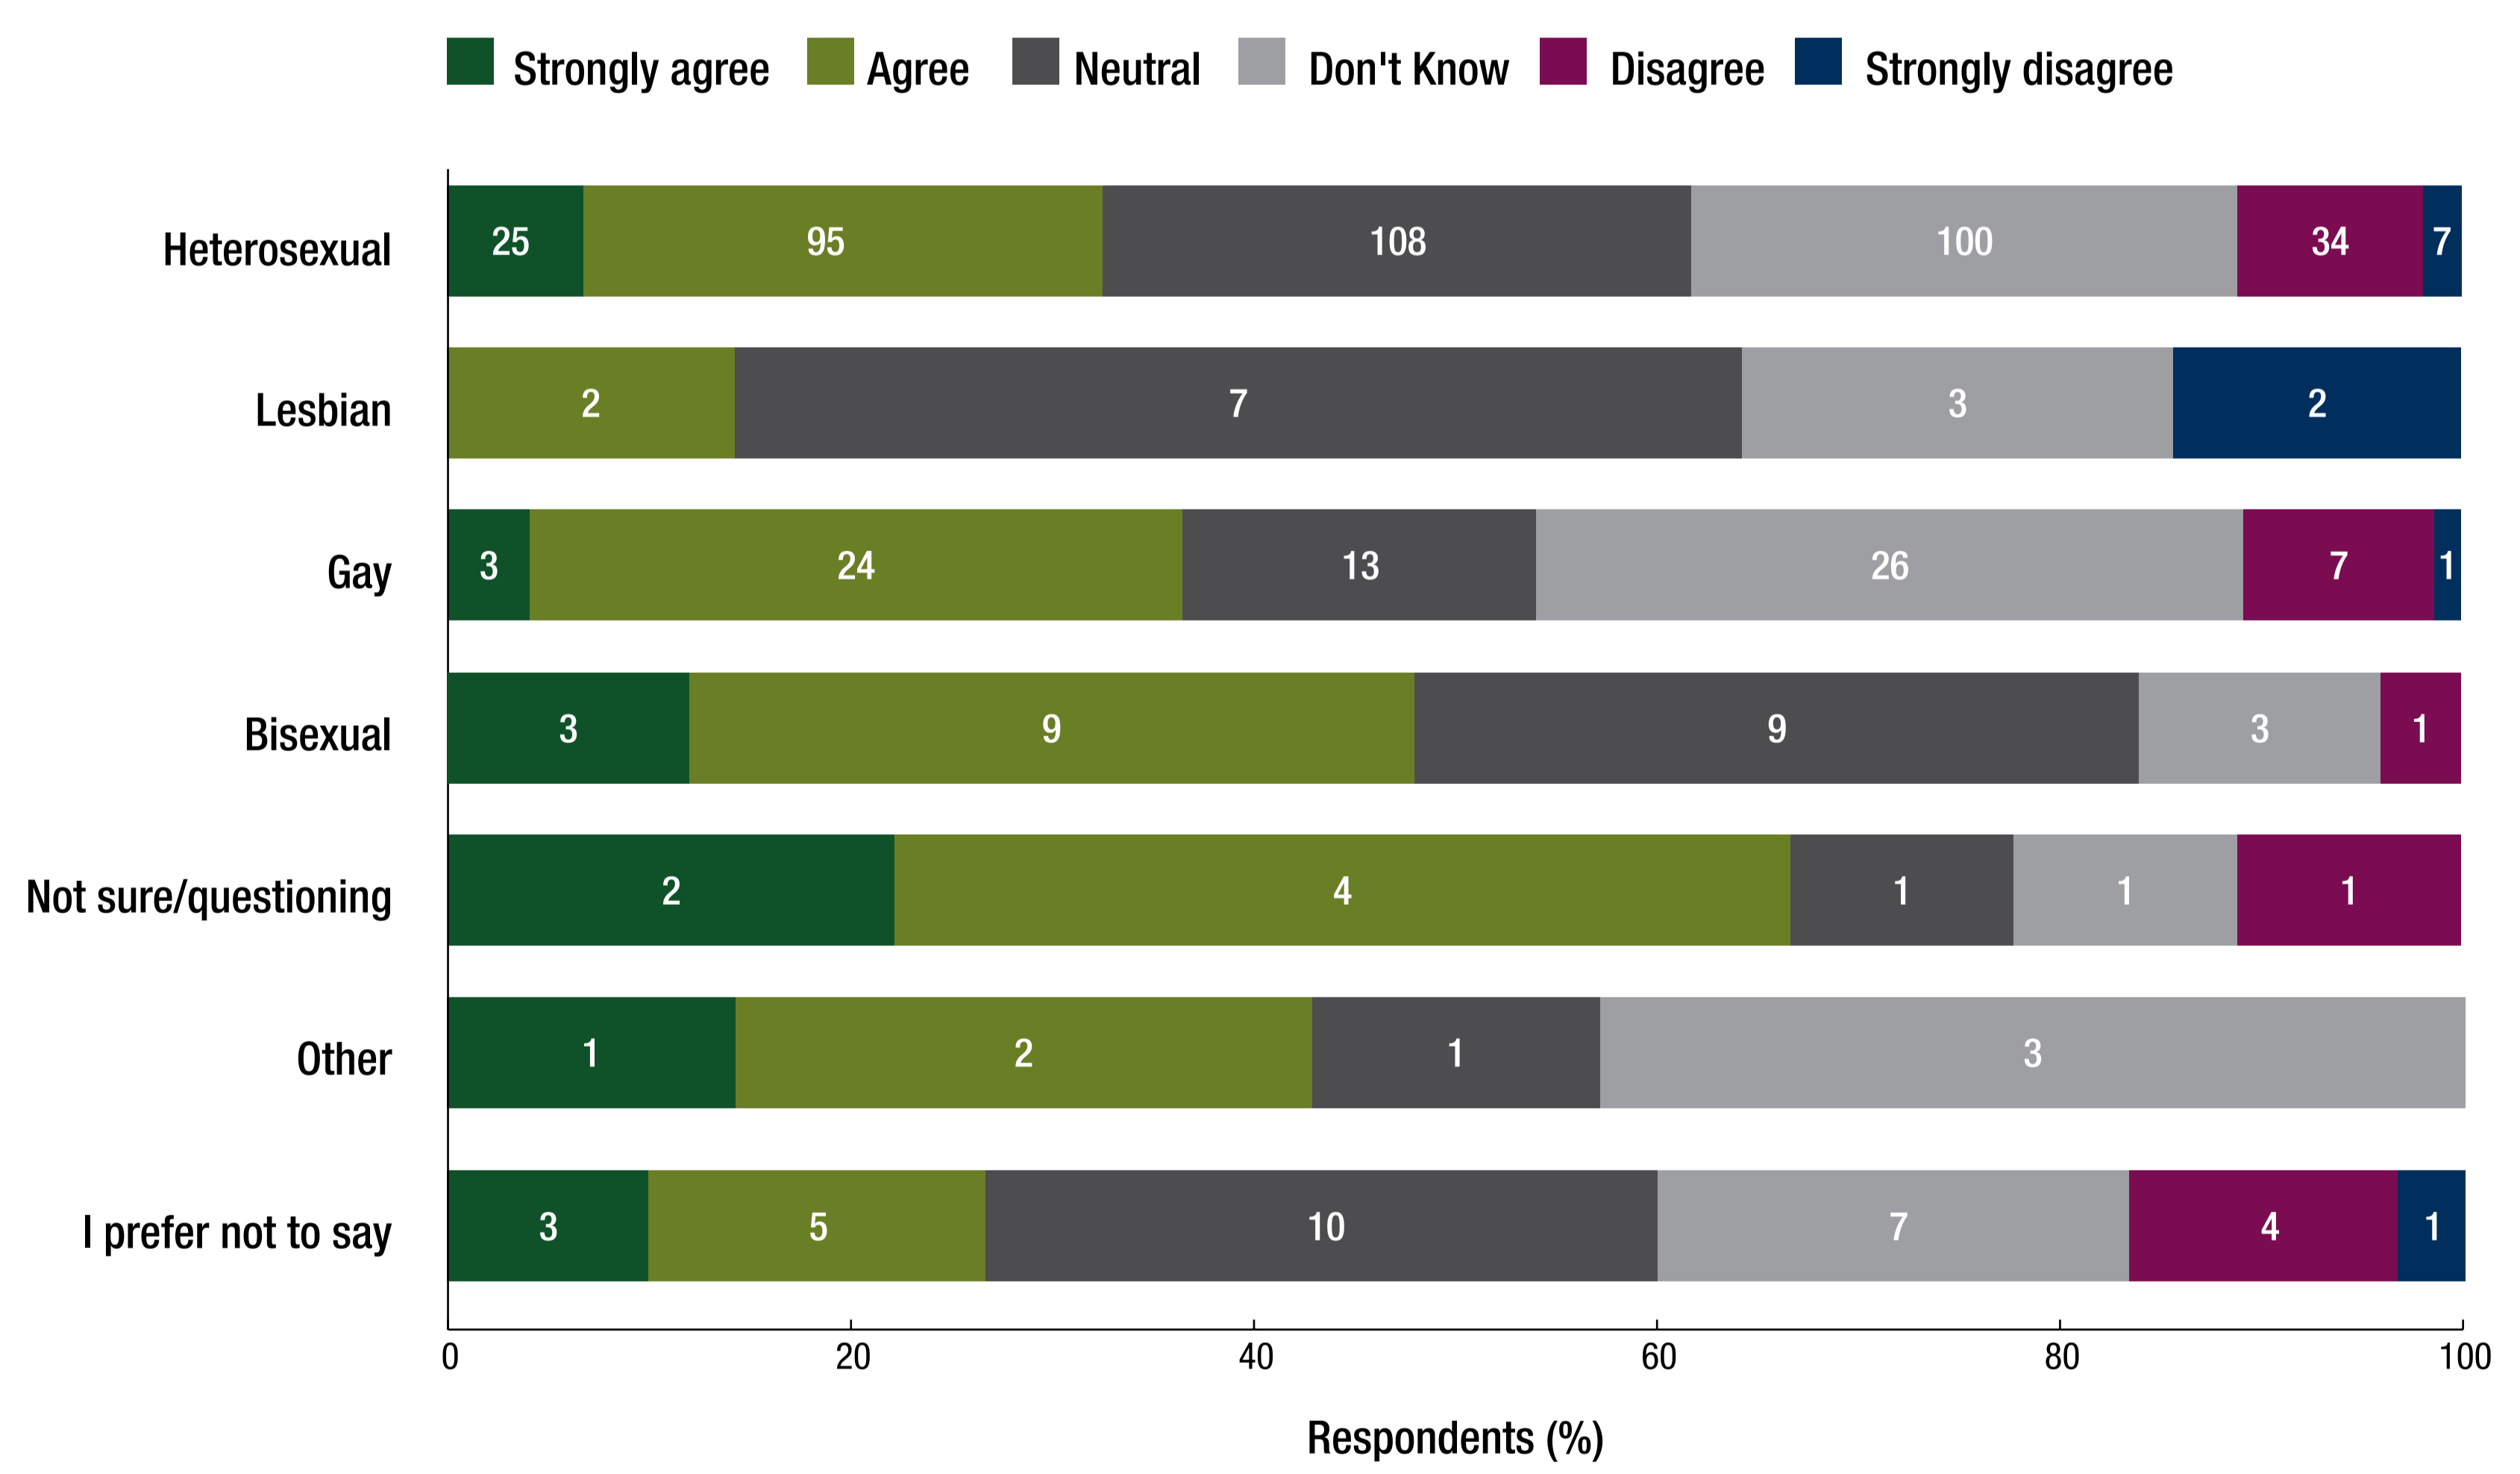

## S3D - Sexual orientation subgroups of respondents who believe that there is a higher prevalence of smoking among LGBTQ people

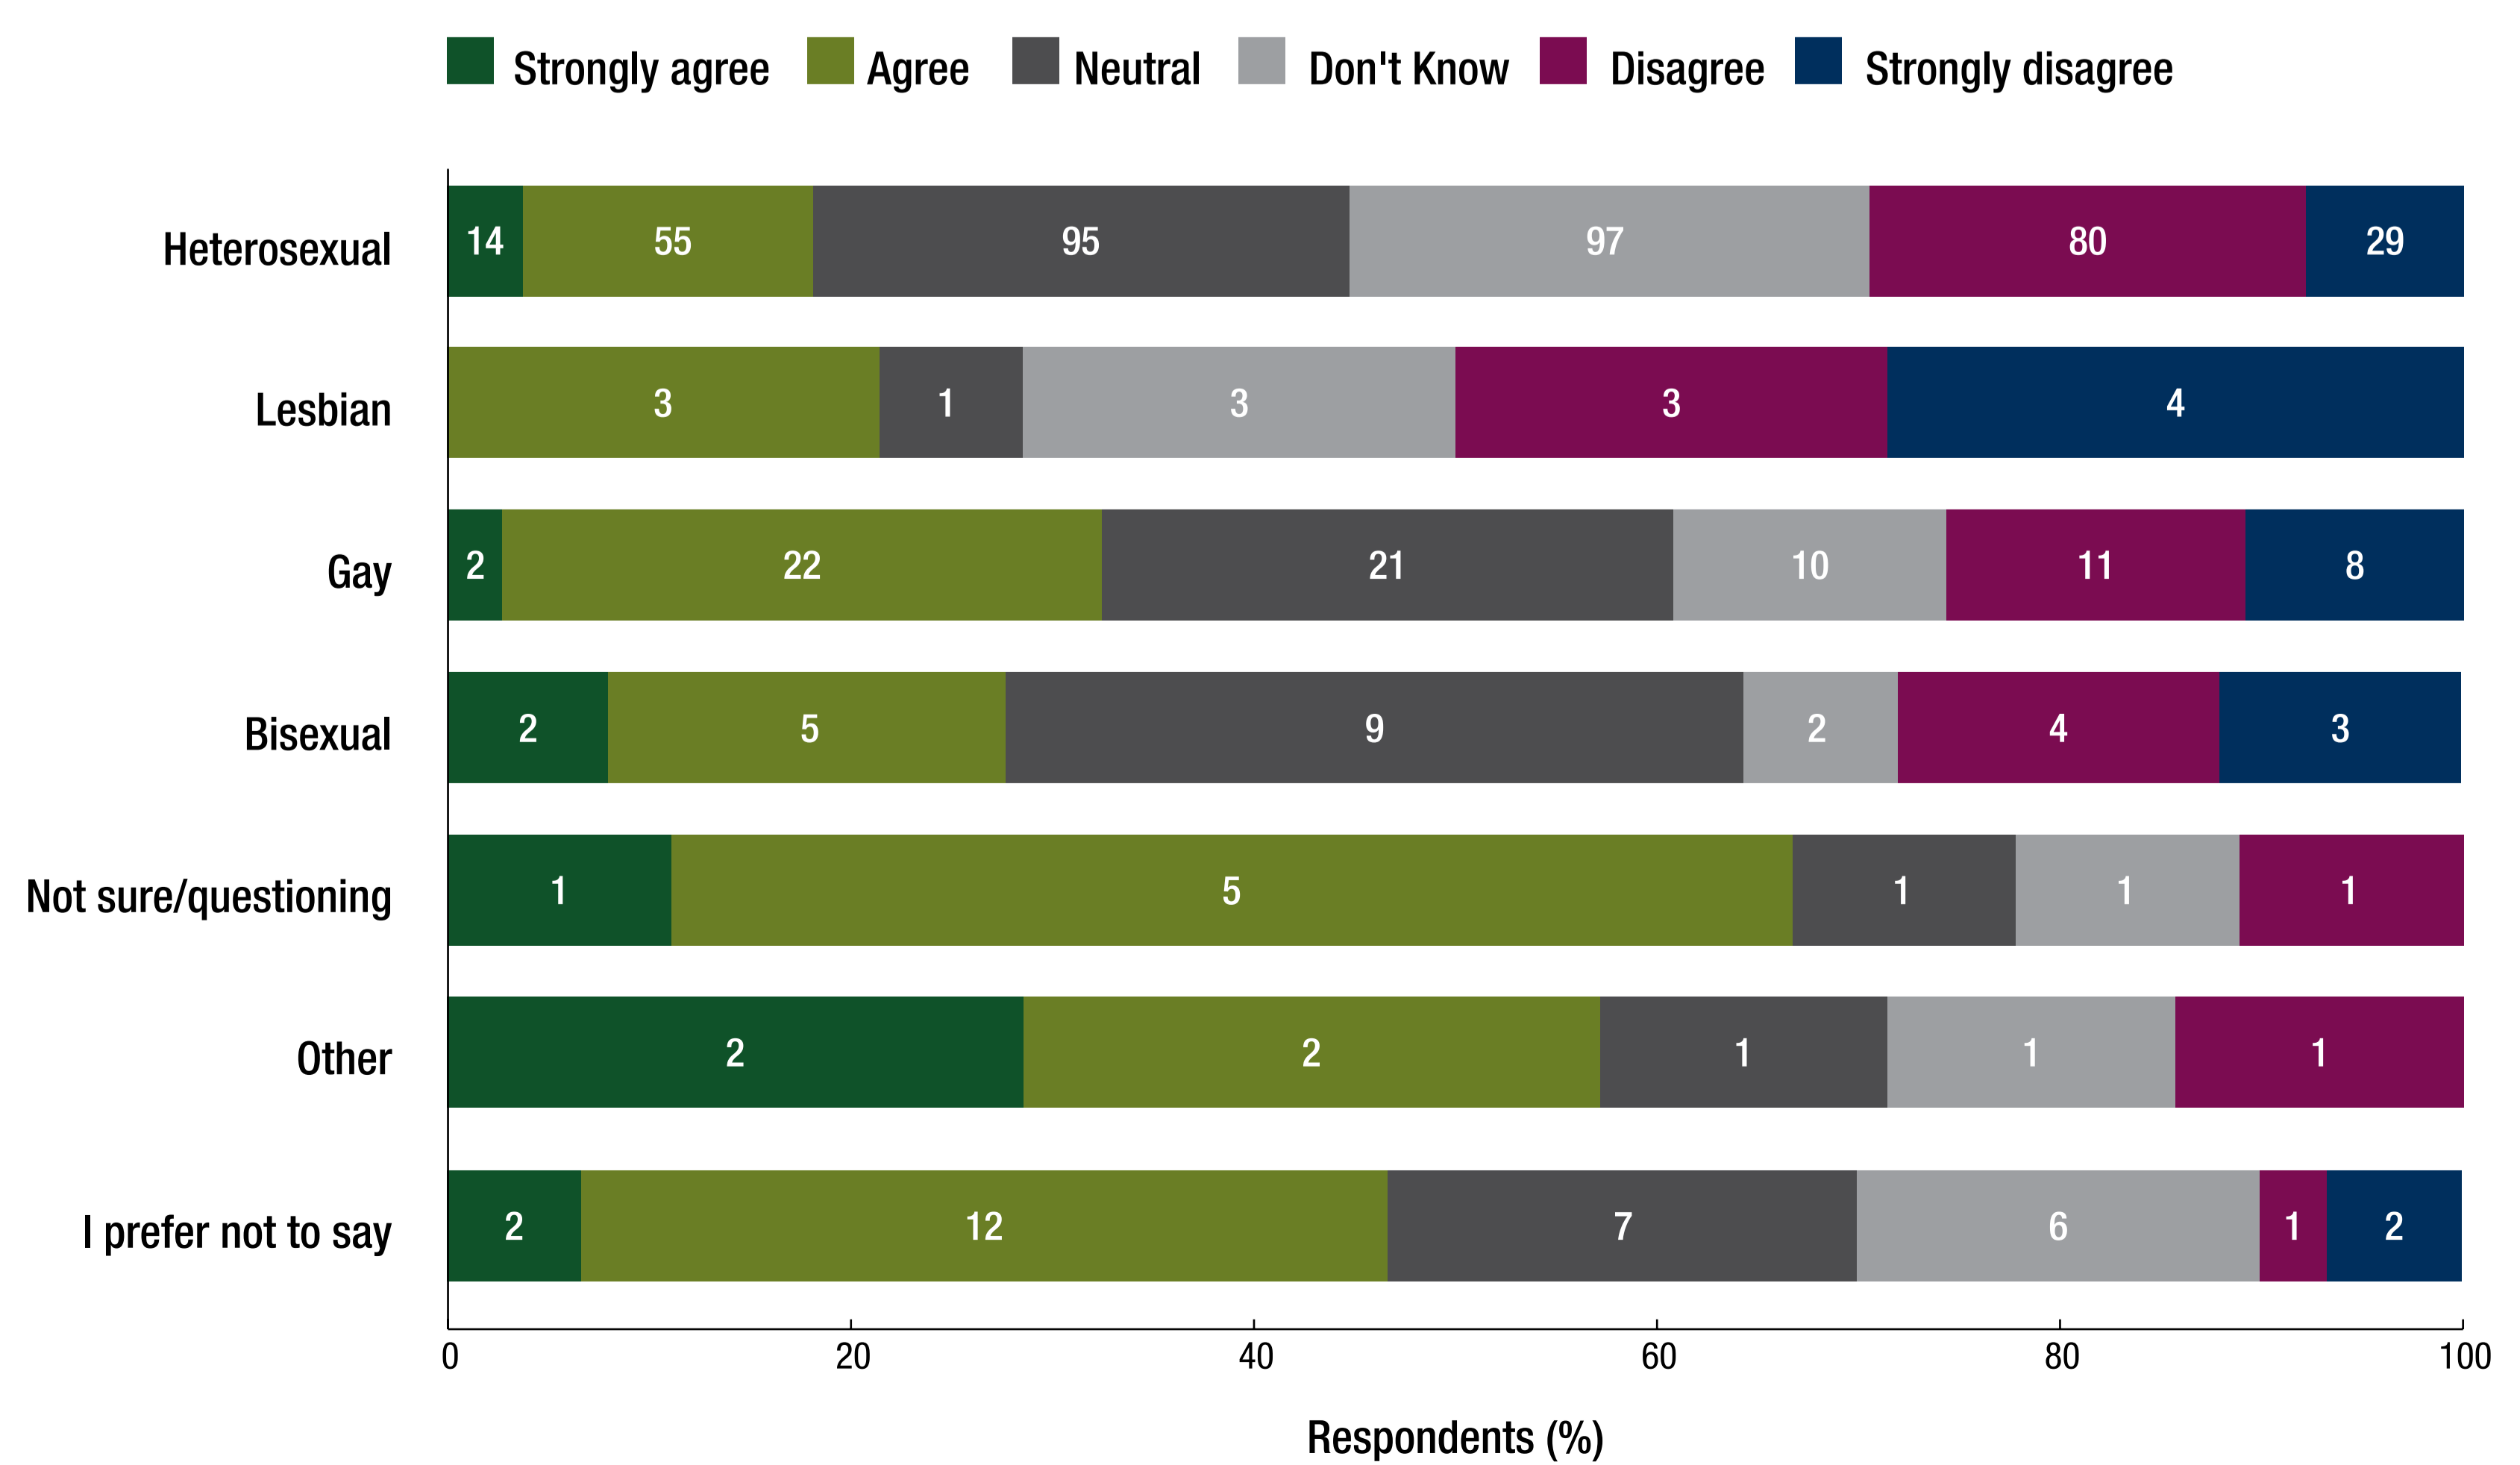

Supplement: mmc3.pdf [file mmc3.pdf]
