# Supplementary material for: An assessment of the attitudes, knowledge, and education regarding the health care needs of LGBTQ patients with cancer: results of an ESMO/SIOPE global survey
Source: PubMed Central journal article supplement — ESMO Open. 2024 Jun 30;9(8):103618. doi: 10.1016/j.esmoop.2024.103618 (PMC11410726; doi:10.1016/j.esmoop.2024.103618), 2024-06-30

# Supplementary Figure 4. Information gathering regarding sexual orientation or gender identity in routine practice

## S4A - Sexual orientation subgroups of respondents who generally assume at first visit that the patient is heterosexual

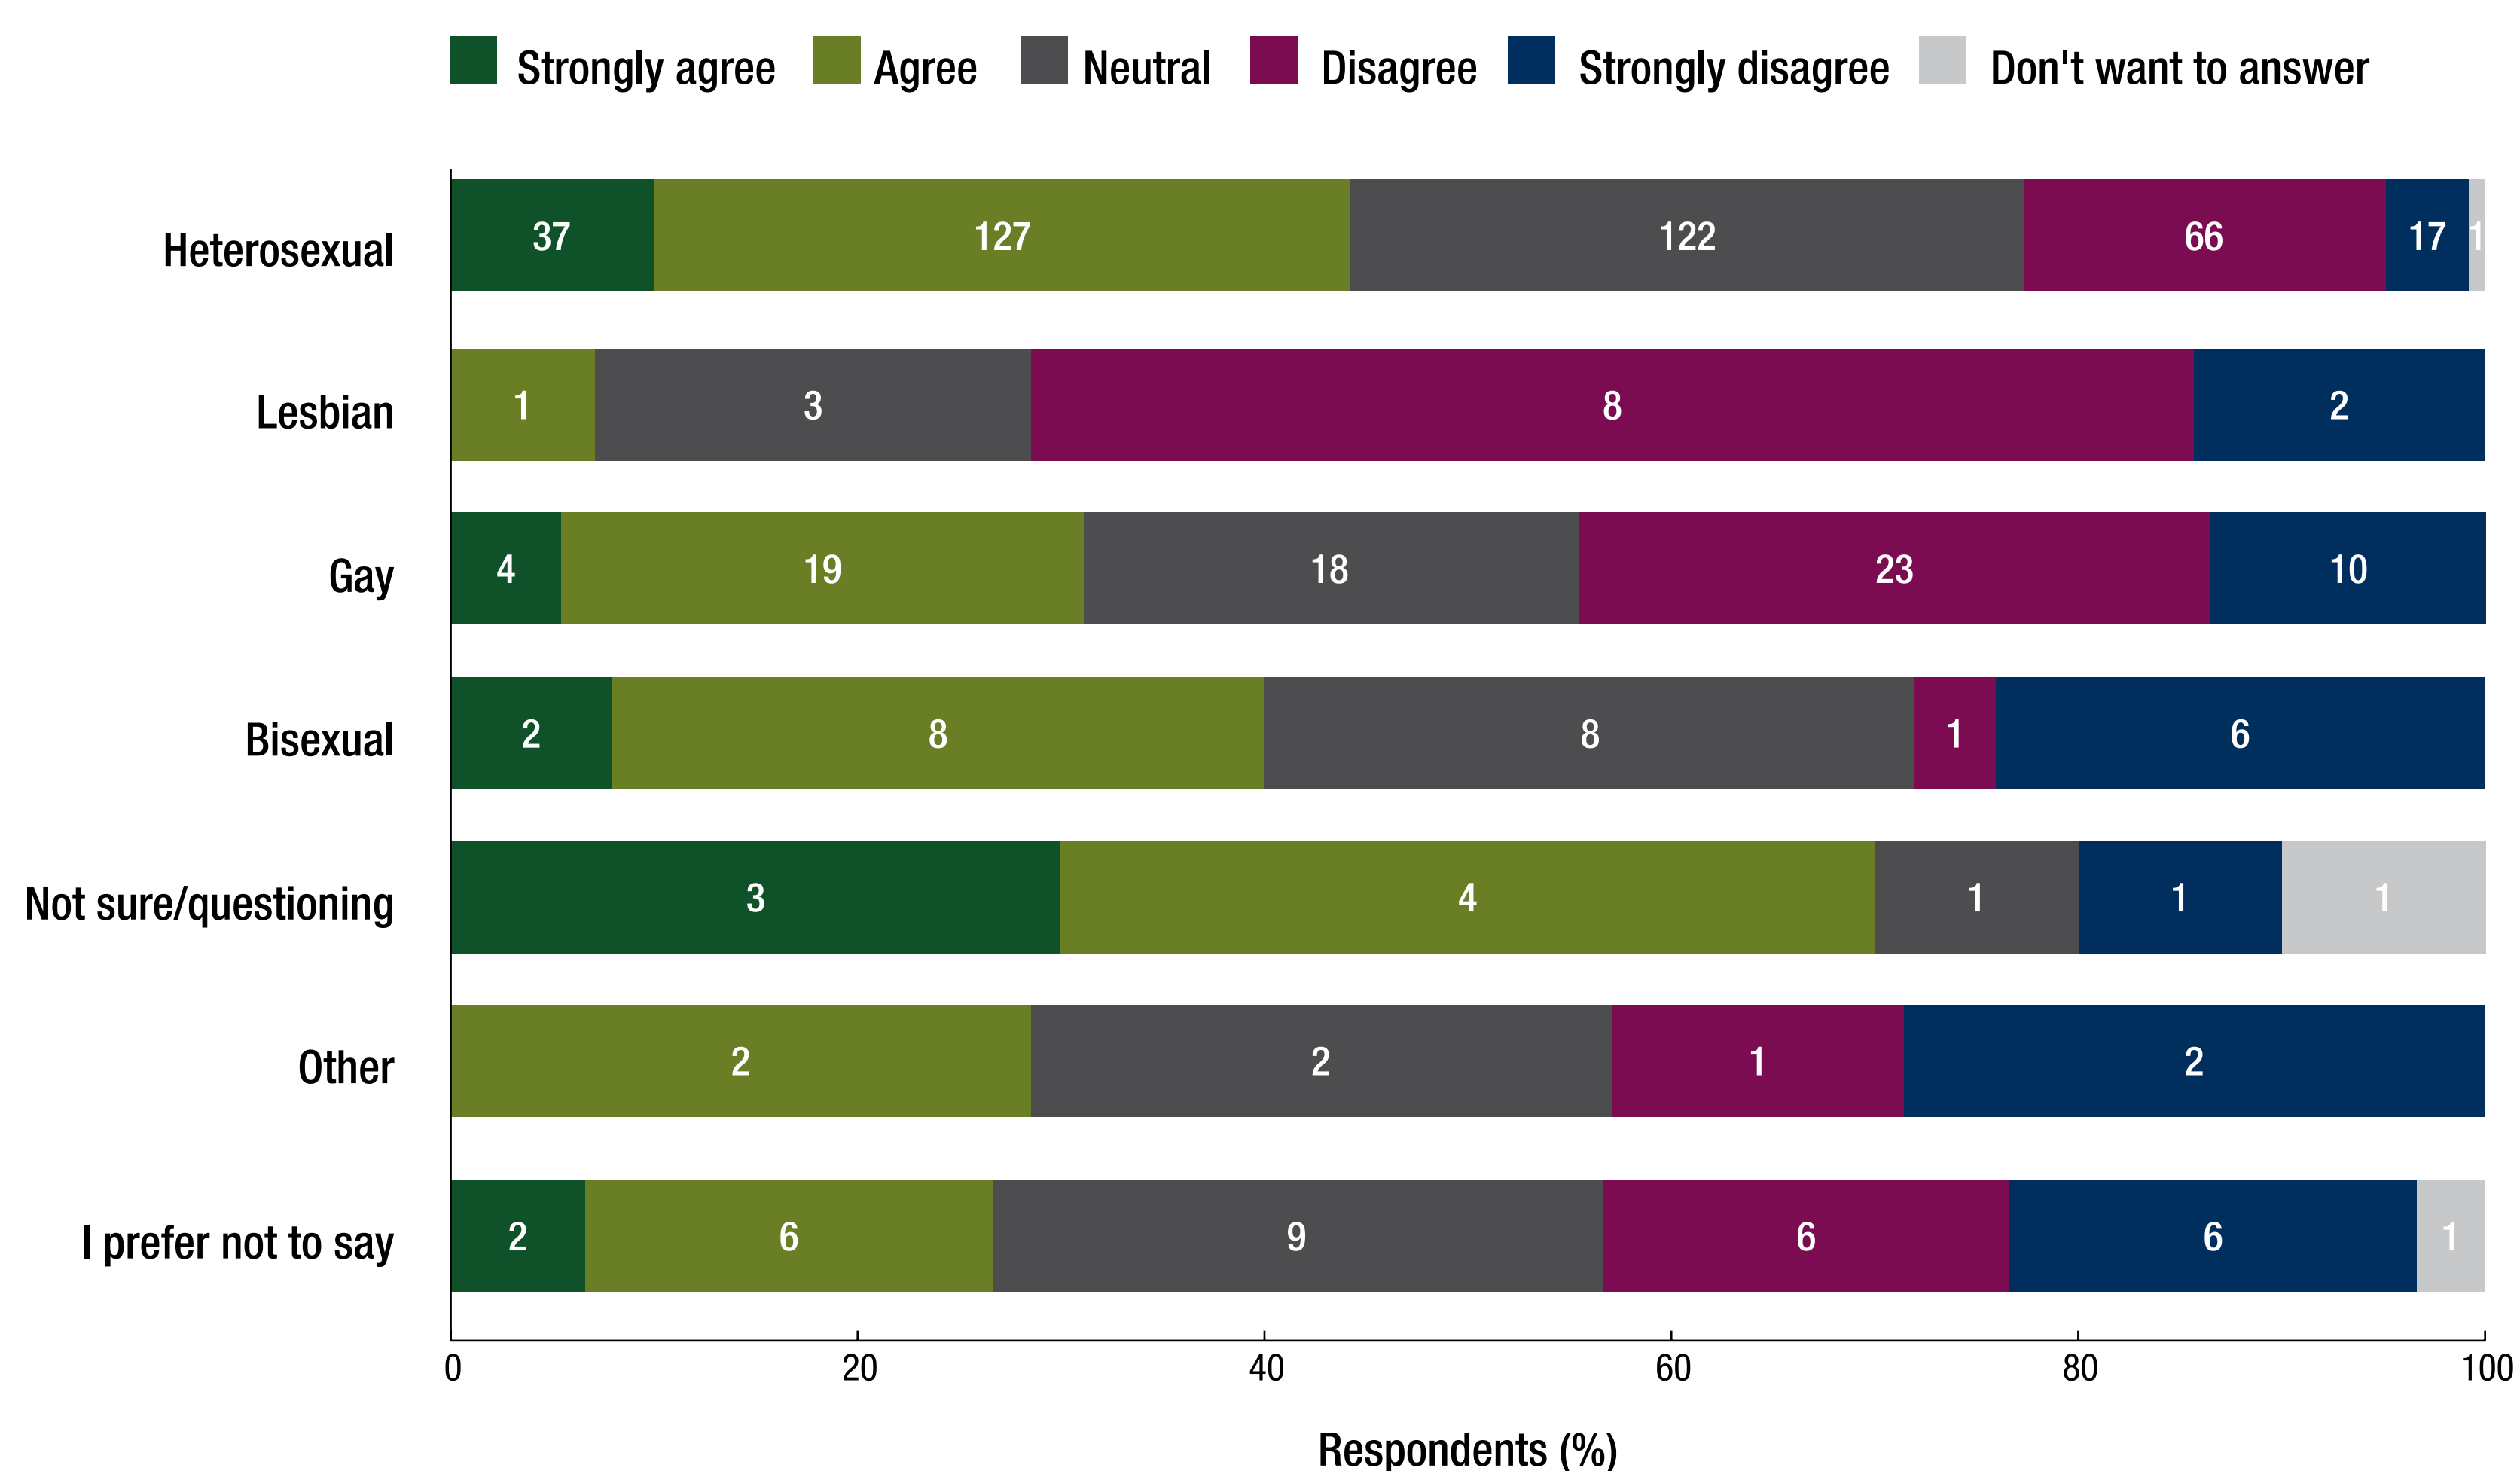

## S4B - Sexual orientation subgroups of respondents who ask about sexual orientation as part of each patients' history

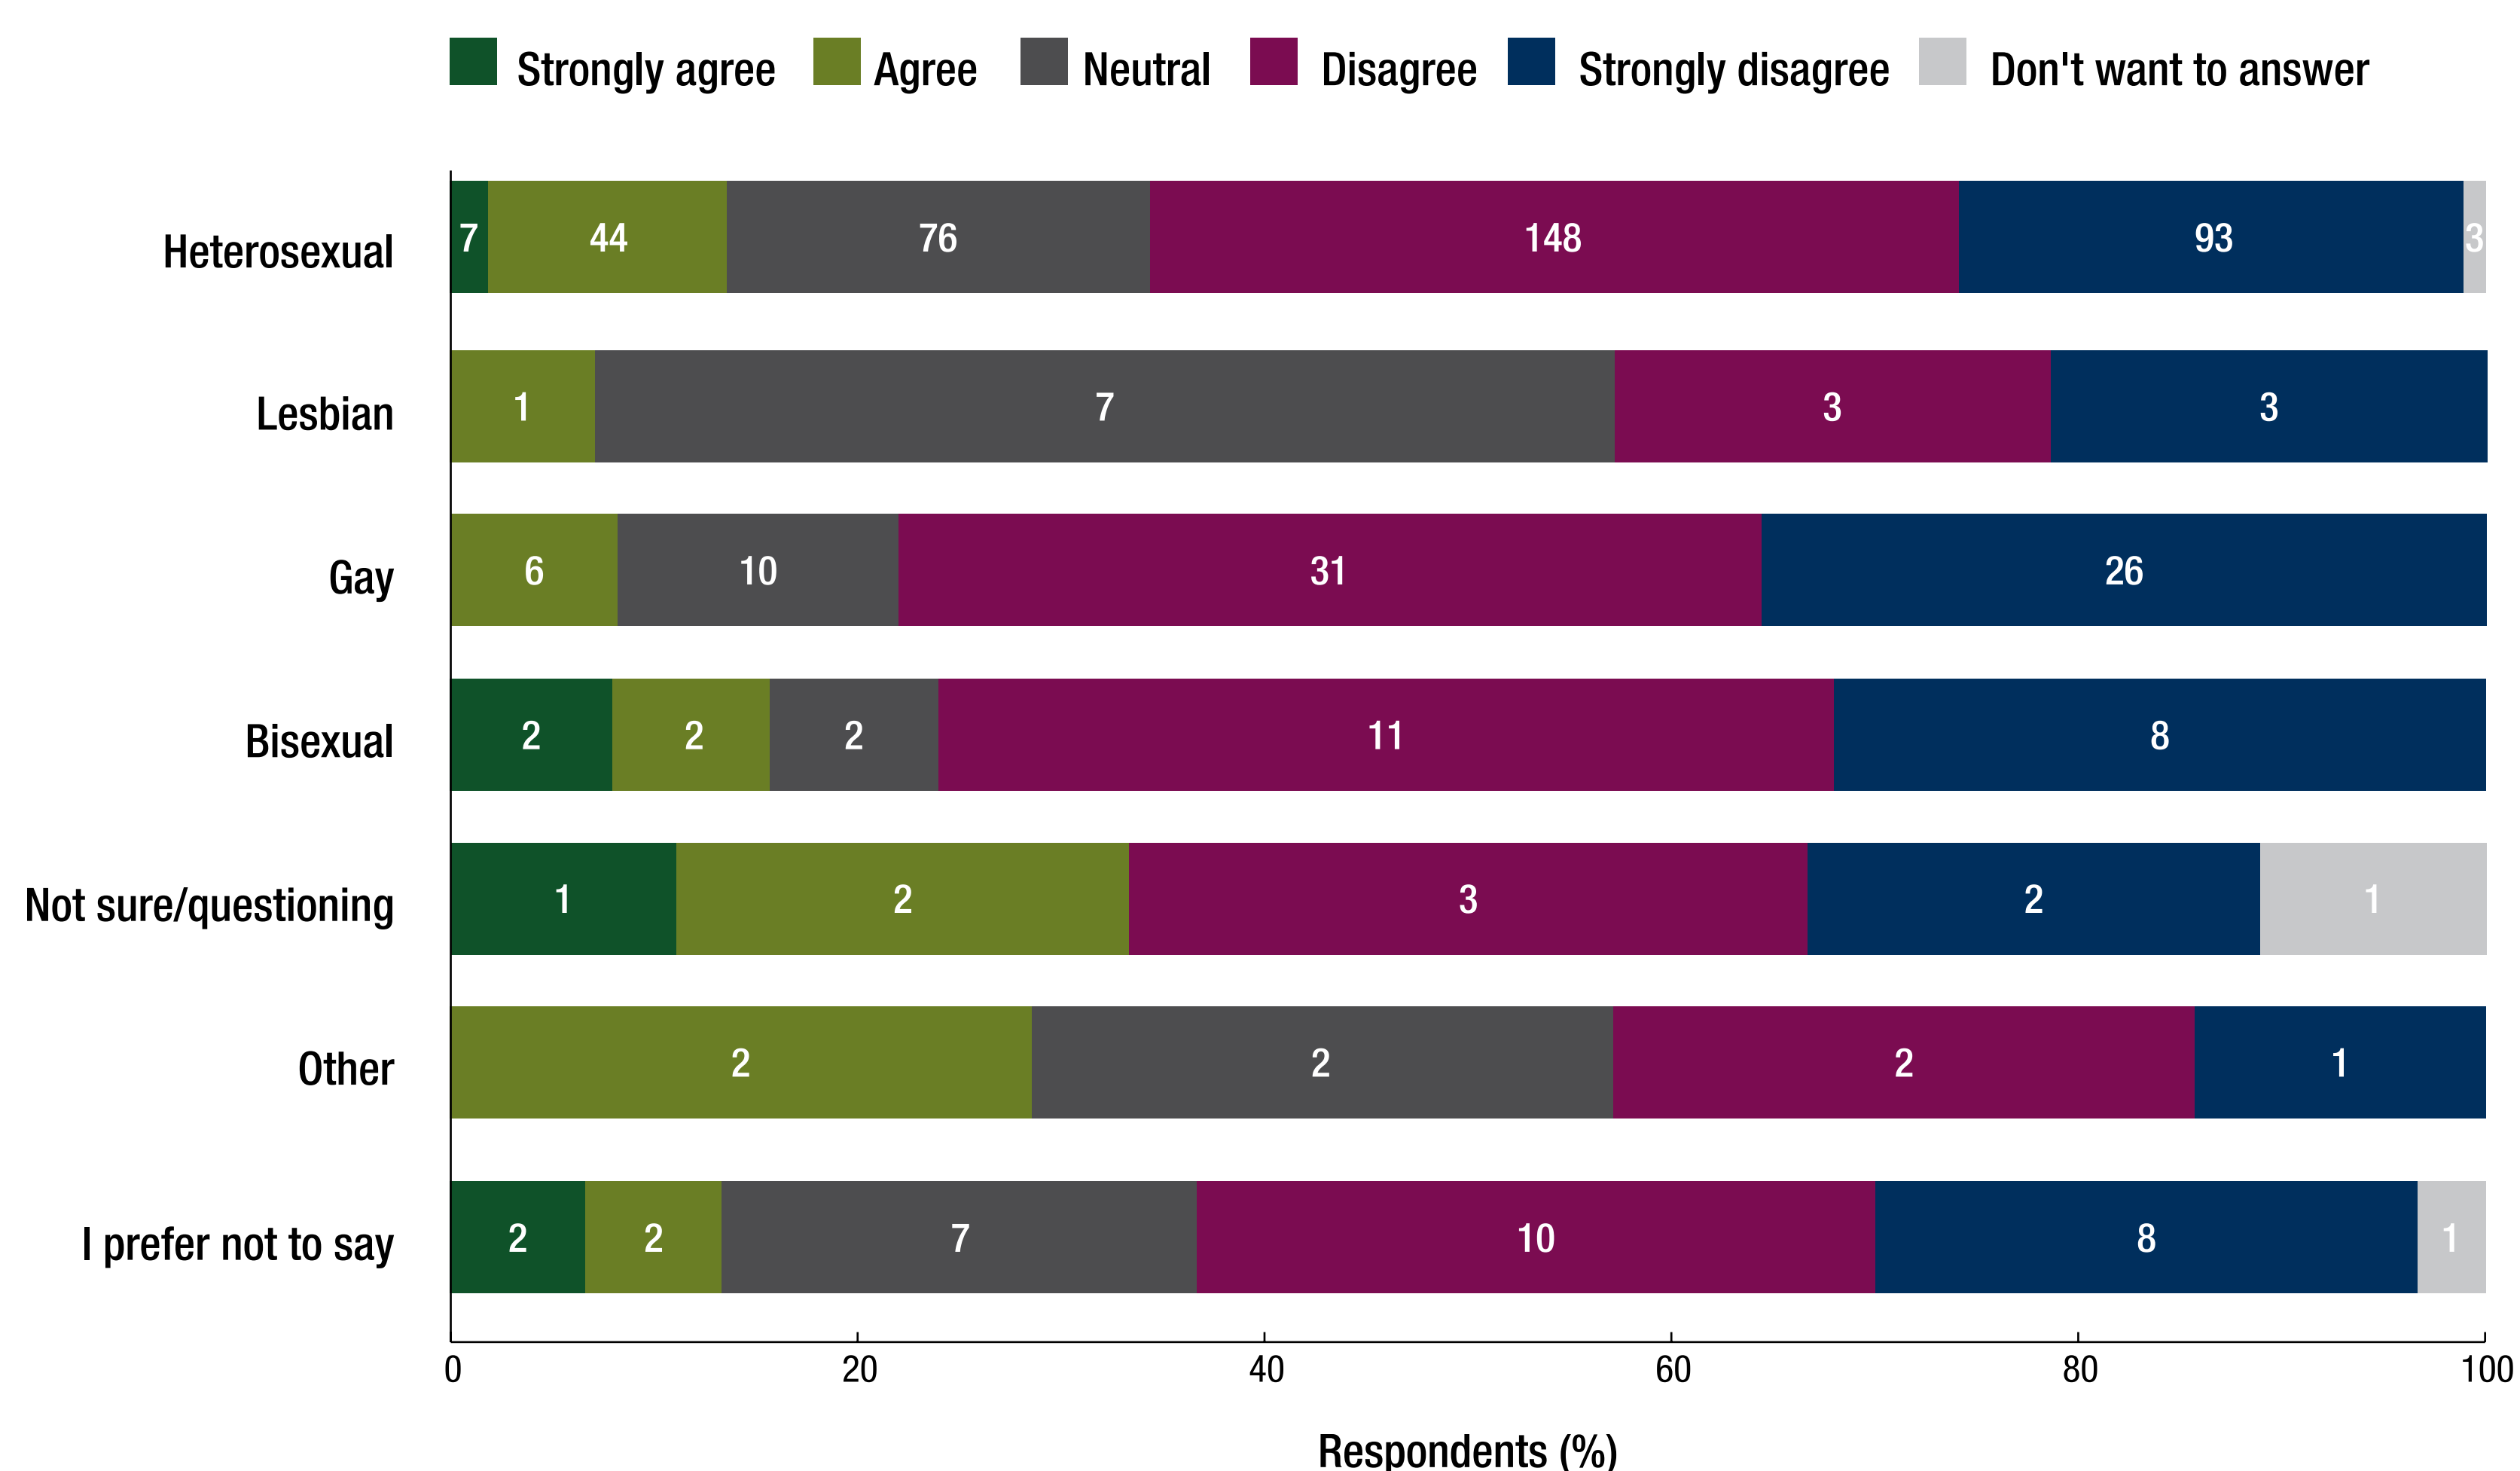

## S4C - Sexual orientation subgroups of respondents who ask about gender identity as part of each patients' history

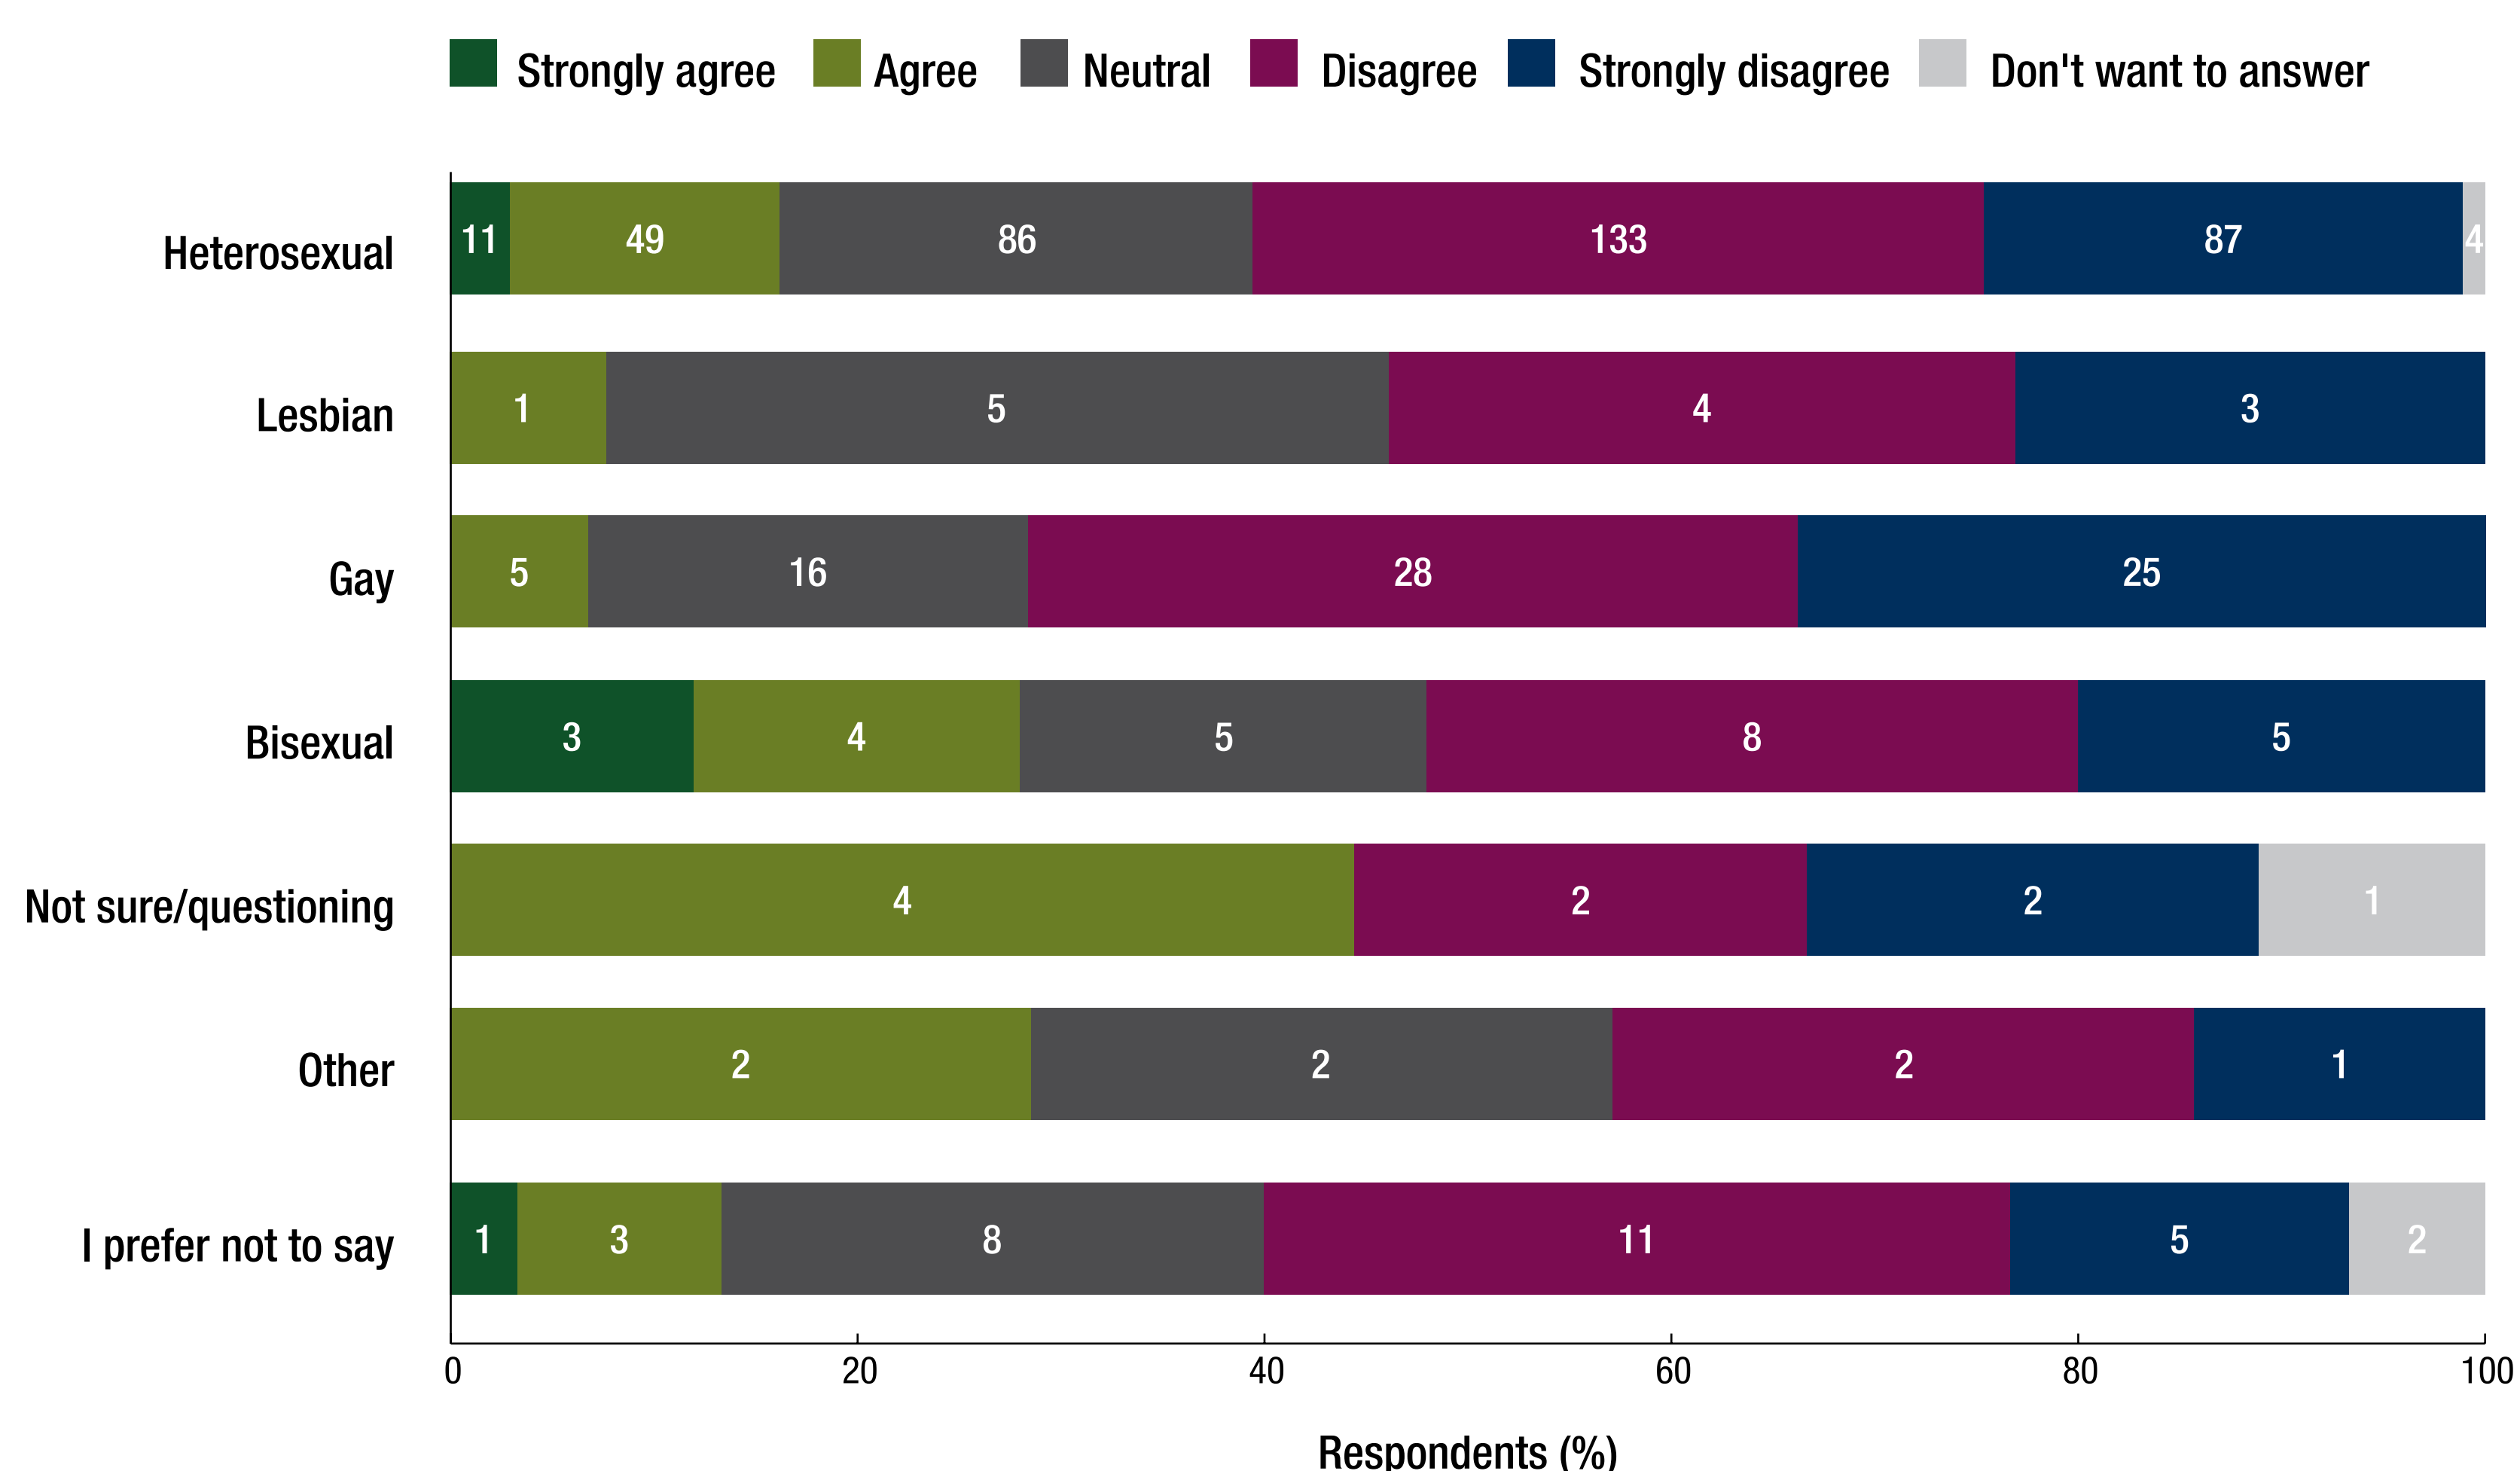

Supplement: mmc4.pdf [file mmc4.pdf]
