# Supplementary material for: An assessment of the attitudes, knowledge, and education regarding the health care needs of LGBTQ patients with cancer: results of an ESMO/SIOPE global survey
Source: PubMed Central journal article supplement — ESMO Open. 2024 Jun 30;9(8):103618. doi: 10.1016/j.esmoop.2024.103618 (PMC11410726; doi:10.1016/j.esmoop.2024.103618), 2024-06-30

# Supplementary Figure 5. Respondent beliefs regarding importance to know about sexual orientation and gender identity of their patients

## S5A - Sexual orientation subgroups of respondents who think that it is important to know the sexual orientation of patients to better treat them

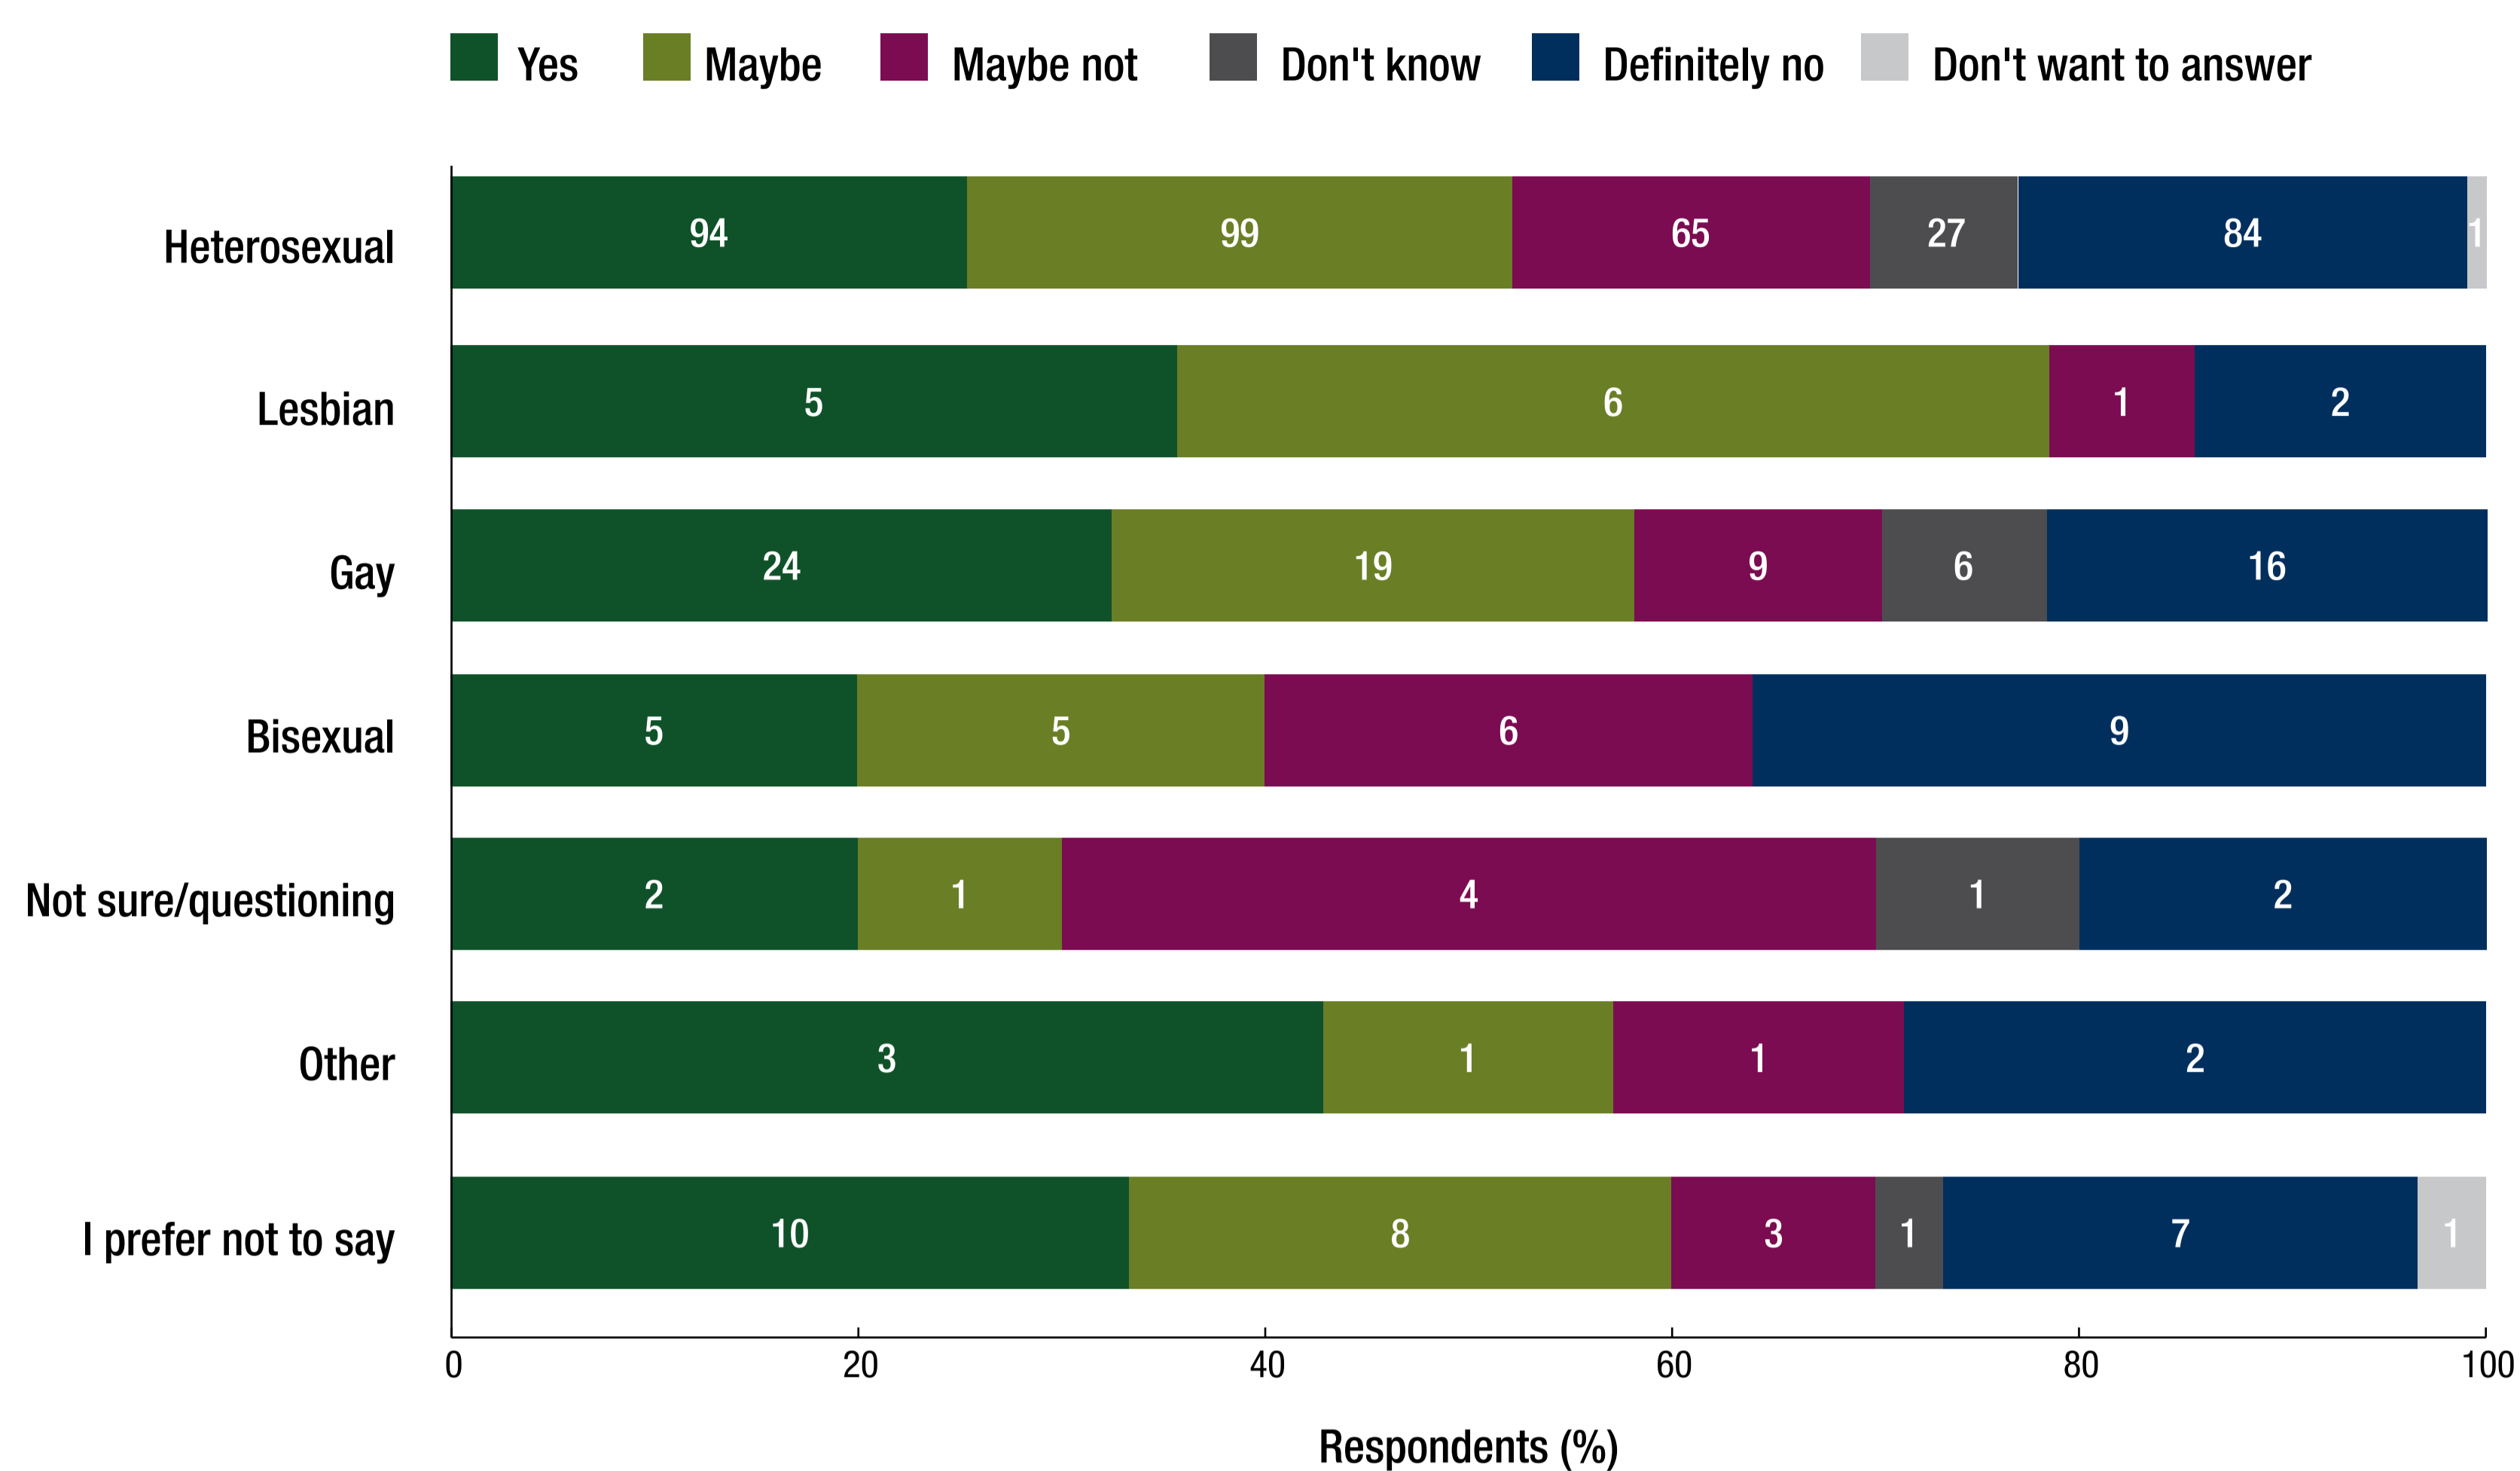

## S5B - Sexual orientation subgroups of respondents who think that it is important to know the gender identity of patients to treat them

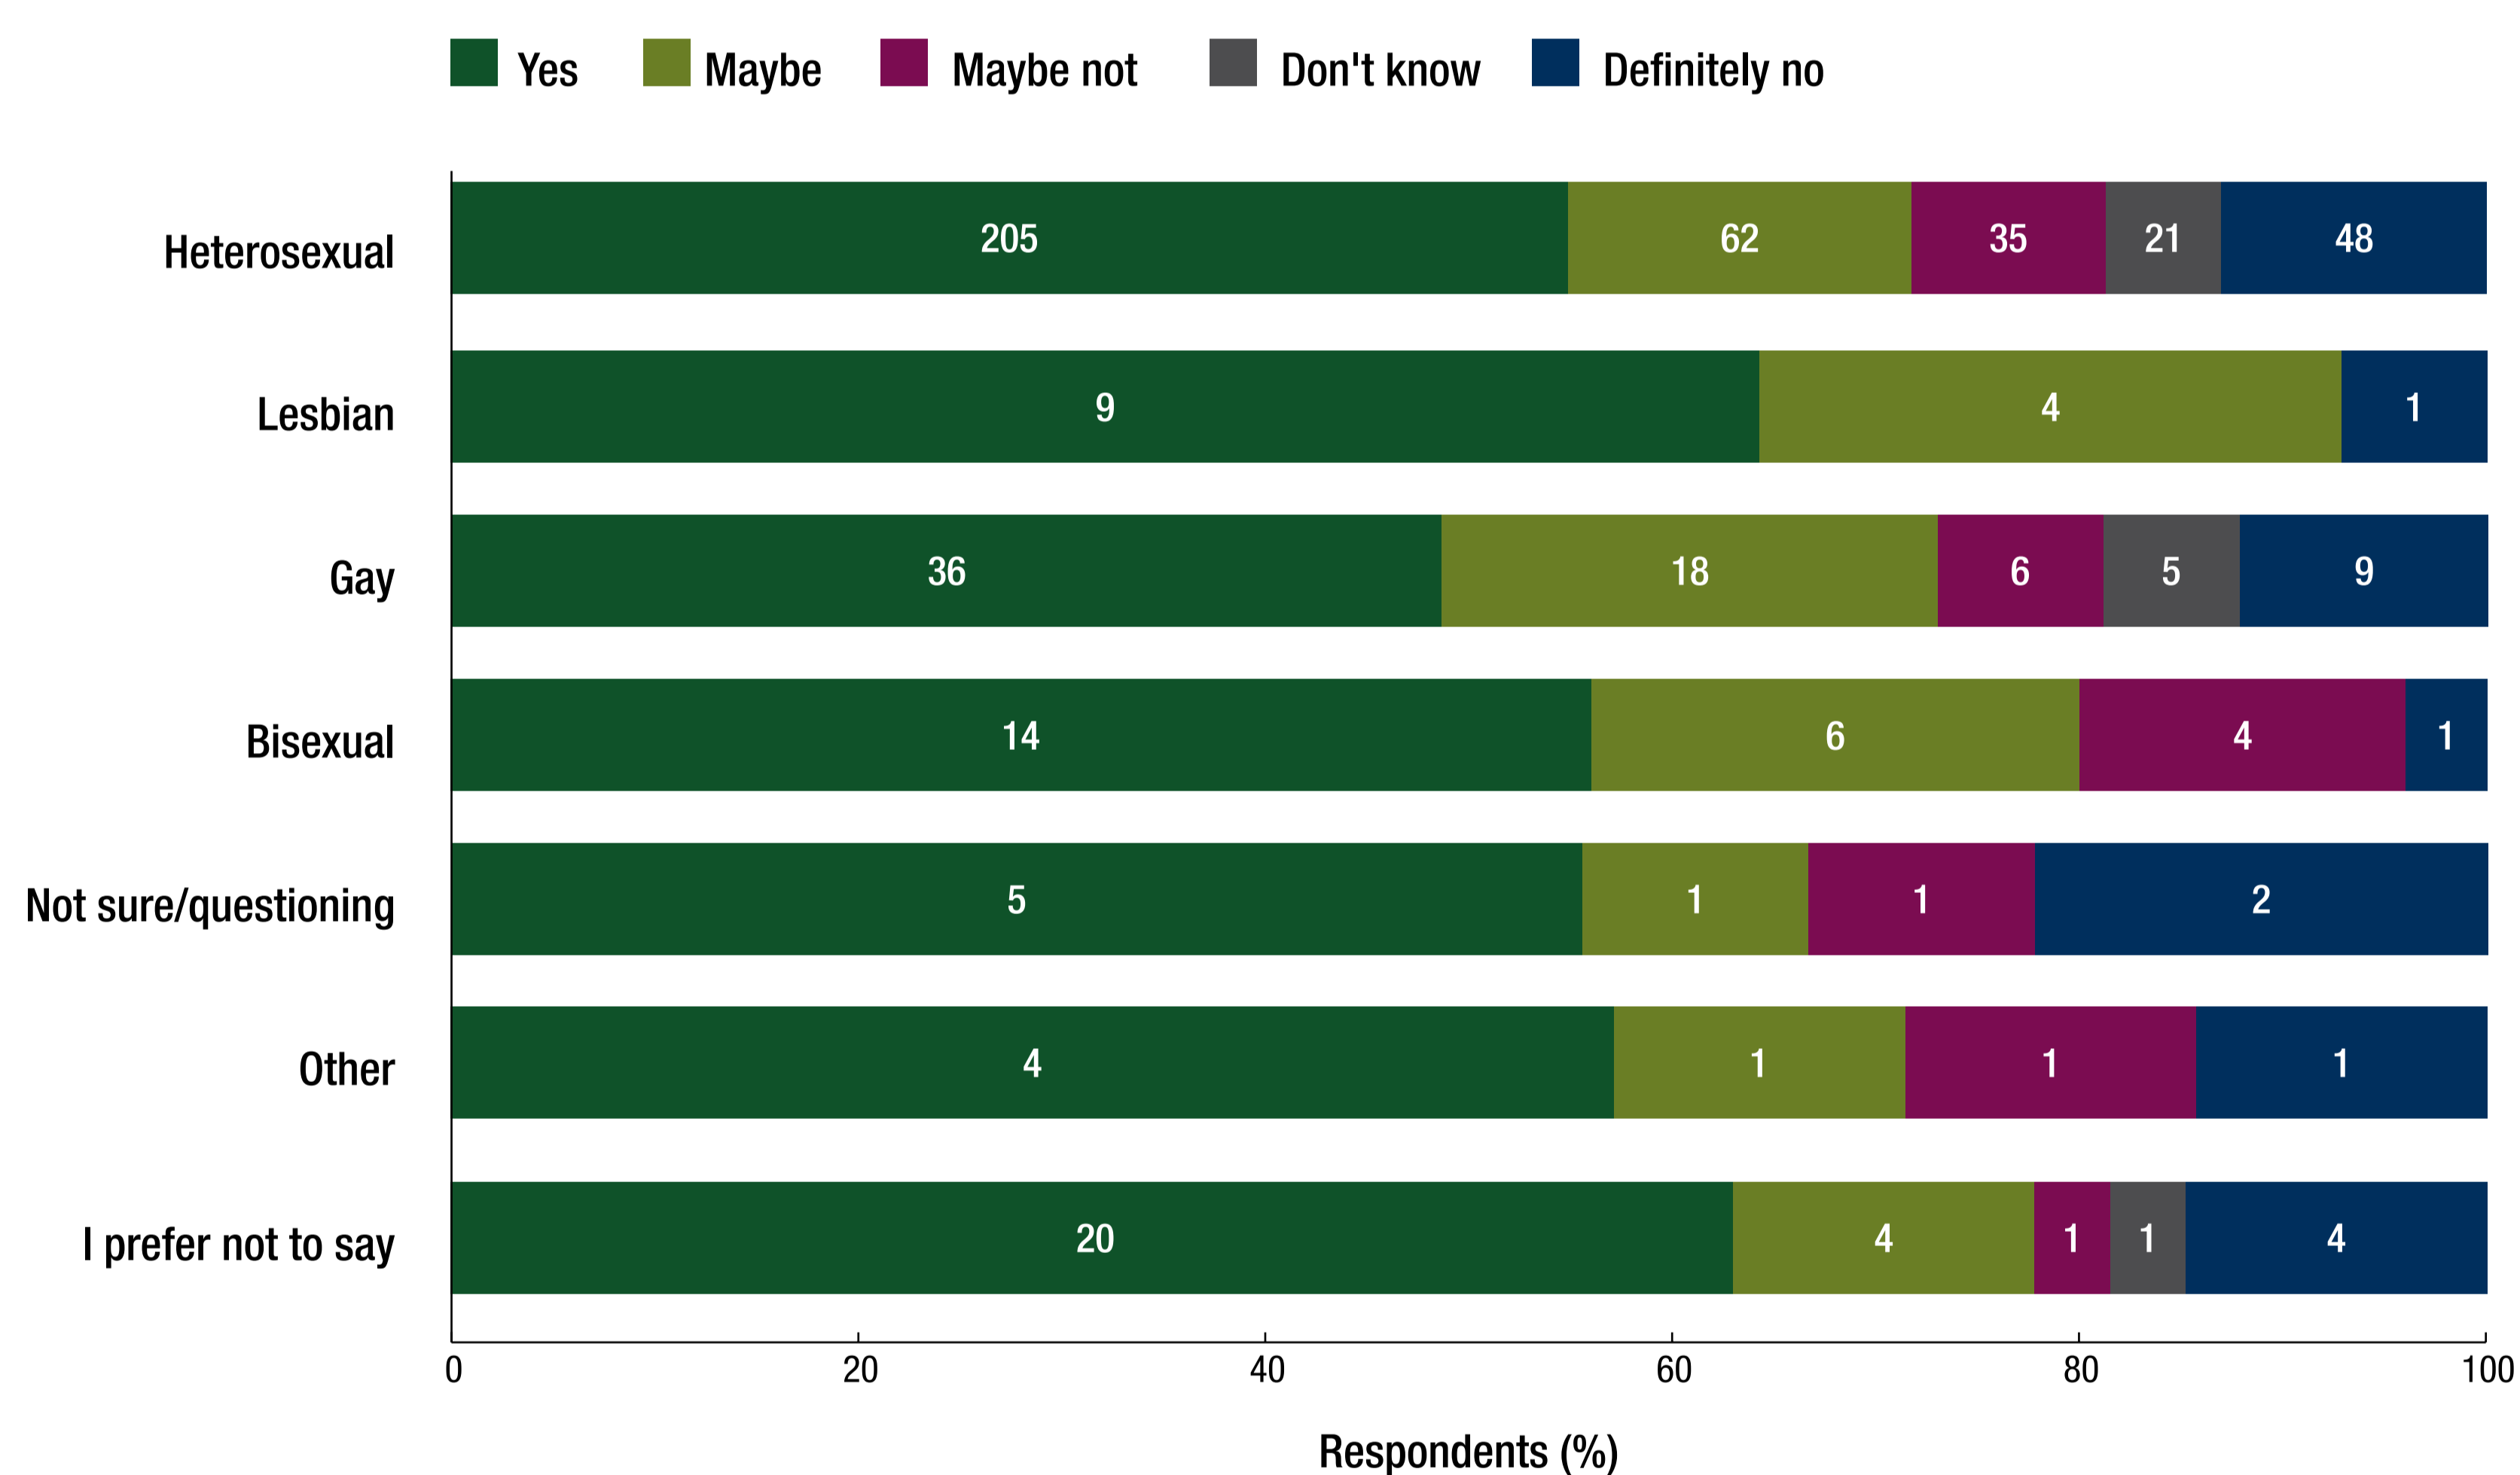

## S5C - Sexual orientation subgroups of respondents who think it is important to know the sex at birth of a patient to treat them

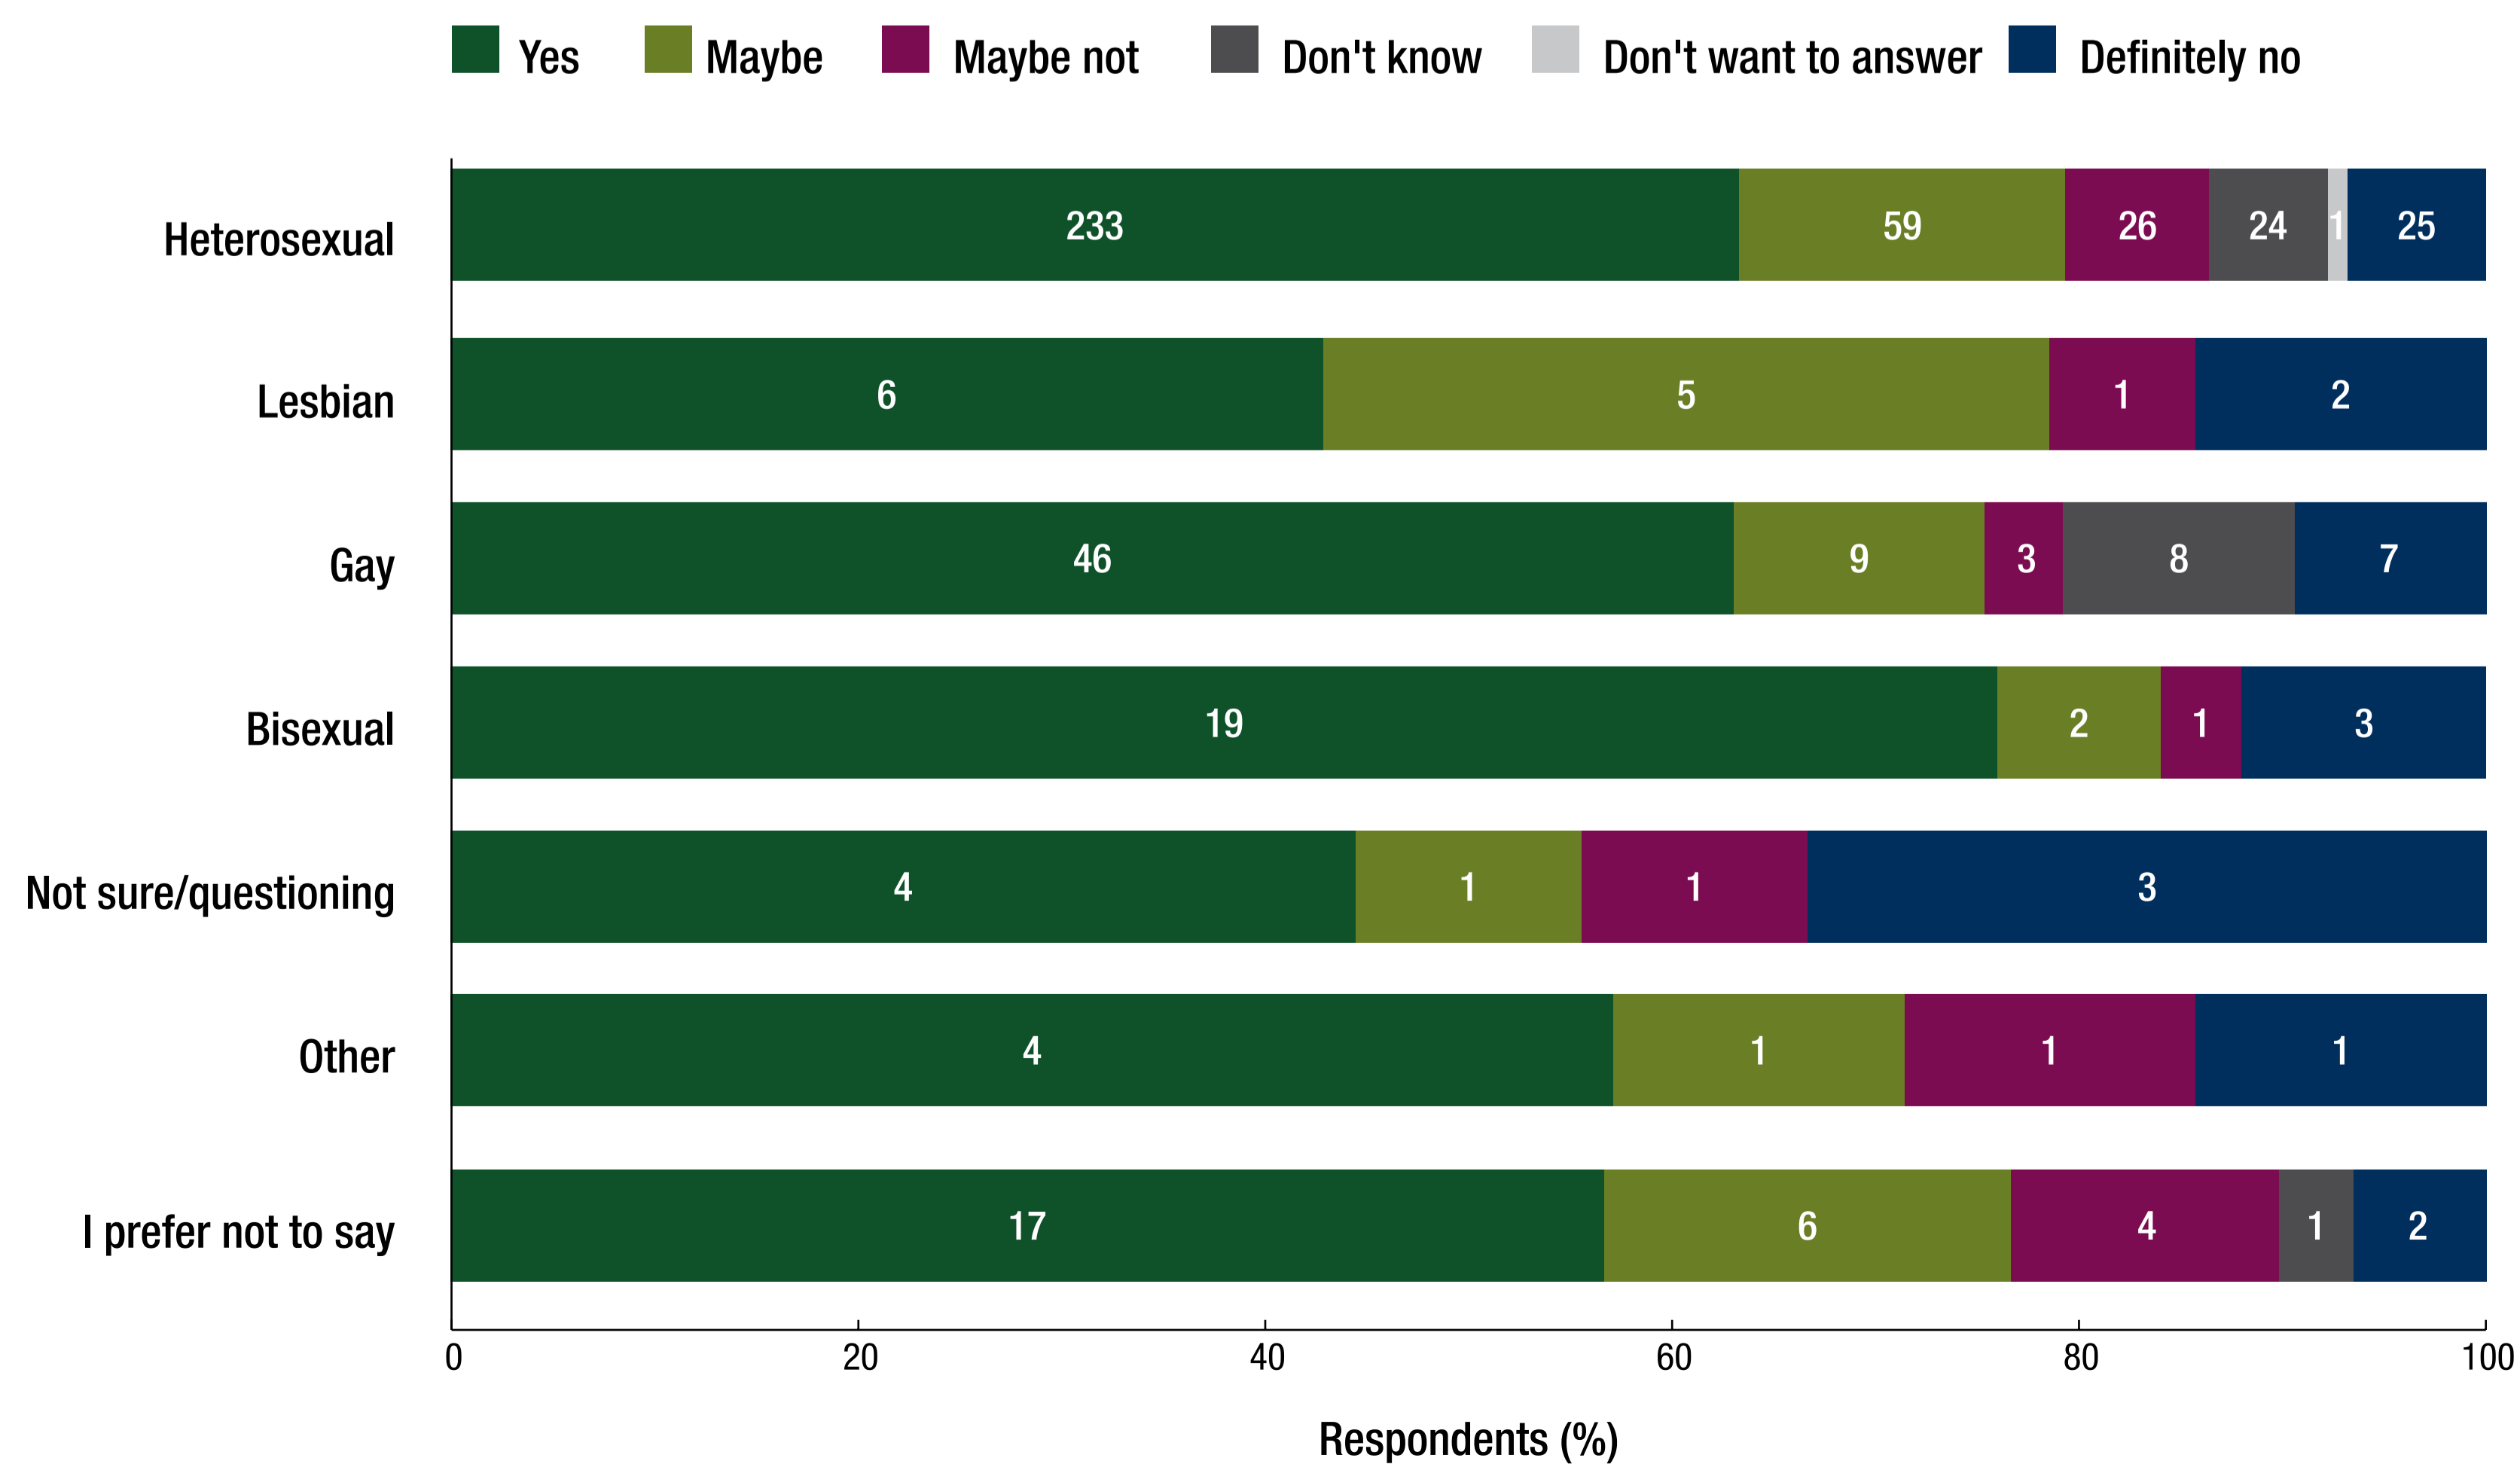

Supplement: mmc5.pdf [file mmc5.pdf]
